28 **ABSTRACT**

29 Natural perception relies inherently on inferring causal structure in the environment.  
30 However, the neural mechanisms and functional circuits that are essential for  
31 representing and updating the hidden causal structure and corresponding sensory  
32 representations during multisensory processing are unknown. To address this, monkeys  
33 were trained to infer the probability of a potential common source from visual and  
34 proprioceptive signals on the basis of their spatial disparity in a virtual reality system.  
35 The proprioceptive drift reported by monkeys demonstrated that they combined  
36 historical information and current multisensory signals to estimate the hidden common  
37 source and subsequently updated both the causal structure and sensory representation.  
38 Single-unit recordings in premotor and parietal cortices revealed that neural activity in  
39 premotor cortex represents the core computation of causal inference, characterizing the  
40 estimation and update of the likelihood of integrating multiple sensory inputs at a trial-  
41 by-trial level. In response to signals from premotor cortex, neural activity in parietal  
42 cortex also represents the causal structure and further dynamically updates the sensory  
43 representation to maintain consistency with the causal inference structure. Thus, our  
44 results indicate how premotor cortex integrates historical information and sensory  
45 inputs to infer hidden variables and selectively updates sensory representations in  
46 parietal cortex to support behavior. This dynamic loop of frontal-parietal interactions in  
47 the causal inference framework may provide the neural mechanism to answer long-  
48 standing questions regarding how neural circuits represent hidden structures for body-  
49 awareness and agency.

50

## 51 INTRODUCTION

52 The brain is constantly confronted with a myriad of sensory signals. Natural perception  
53 relies inherently on inferring the environment's hidden causal structure(Deroy, Spence,  
54 & Noppeney, 2016; French & DeAngelis, 2020; Lochmann & Deneve, 2011). In the  
55 process of building representation of the bodily self, the brain combines, in a near-  
56 optimal manner, information from multiple sensory inputs. When a single entity (e.g.  
57 the bodily self) evokes correlated noisy signals, our brain combines the information to  
58 infer the properties of this entity on the basis of the quality and uncertainty of the  
59 sensory stimuli. As a result, behavioral performance often benefits from combining  
60 information using such uncertainty-based weighting across sensory systems(Stein &  
61 Stanford, 2008). However, in a natural environment, multiple sensory cues are typically  
62 produced by more than one source (for example, two entities), which should not be  
63 integrated in the brain, especially when the superposing cues are sufficiently dissimilar  
64 and uncorrelated. Instead, the brain's inferential process of integration breaks down,  
65 leading to the perception that these cues originate from distinct entities. This process of  
66 inferring the causes of sensory inputs for perception is known as causal  
67 inference(Kording et al., 2007).

68 Thus far, most of neurobiological studies of multisensory processing have operated  
69 under the assumption that different streams of sensory information can arise from the  
70 same source. For example, previous neurophysiological research in monkeys showed  
71 that neurons implement reliability-weighted integration on the premise that visual and  
72 vestibular signals are from one common source(Fetsch, DeAngelis, & Angelaki, 2013;  
73 Morgan, Deangelis, & Angelaki, 2008; Porter, Metzger, & Groh, 2007). Therefore,  
74 despite the ubiquity of the phenomenon of causal inference and much psychophysical  
75 and theoretical research(Acerbi, Dokka, Angelaki, & Ma, 2018; Dokka, Park, Jansen,

76 DeAngelis, & Angelaki, 2019; Kayser & Shams, 2015; Kording et al., 2007; Mohl,  
77 Pearson, & Groh, 2020; Rohe & Noppeney, 2015; Sato, Toyozumi, & Aihara, 2007),  
78 its neural mechanisms and functional circuits remain largely unknown. While recent  
79 studies in humans have begun to establish neural correlates(Aller & Noppeney, 2019;  
80 Cao, Summerfield, Park, Giordano, & Kayser, 2019; Rohe, Ehrlis, & Noppeney, 2019;  
81 Rohe & Noppeney, 2015, 2016), the sequential process of first encoding the sensory  
82 signals, subsequently combining them with prior information to infer whether the  
83 sources should be assigned to the same entity for later information integration or  
84 segregation, and finally, but most importantly, updating prior information for both the  
85 hidden structure of the environmental sources and their downstream sensory  
86 representations has never been studied at the single-neuron resolution in animals.

87 In the present study, we established an objective and quantitative signature of  
88 causal inference at a single-trial level using a reaching task and a virtual reality system  
89 in macaque monkeys. We showed that monkeys combined historical information and  
90 current multisensory signals to estimate the hidden common source, and more  
91 importantly, subsequently updated both the causal structure and sensory representation  
92 during the inference. We then further recorded from the premotor and parietal (area 5)  
93 cortices of three monkeys to investigate the neural dynamic and functional circuits of  
94 causal inference in multisensory processing. Our behavioral and neural results reveal a  
95 complete account of neural computation that appears to mediate causal inference  
96 behavior, which includes inferring a hidden common source and updating prior and  
97 sensory representations at different hierarchies.

98

99

100

## 101 **RESULTS**

### 102 **Behavioral paradigm**

103 Using a virtual-reality system, we trained three monkeys (monkeys H, N, and S) to  
104 reach for a visual target with their nonvisible (proprioceptive) arm while viewing a  
105 virtual arm moving in synchrony with a preset spatial visual-proprioceptive (VP)  
106 disparity (Fig. 1A). On each trial of the experiment, the monkeys were required to  
107 initiate the trial by placing their hand on the starting position (blue dot) for 1 s and were  
108 instructed not to move. After the initiation period, the starting point disappeared and  
109 the visual virtual arm was rotated; this mismatch arm was maintained for 0.5 s as the  
110 preparation period. The reaching target was presented as a “go” signal, and monkeys  
111 had to reach toward the visual target within 2.5 s and place their hand in the target area  
112 for 0.5 s, referred to as the target-holding period, to receive a reward. Any arm  
113 movement during the target-holding period automatically terminated the trial. The  
114 proprioceptive drift due to the disparity between visual and proprioceptive inputs was  
115 measured at the endpoint of the reach and was defined as the angle difference between  
116 the proprioceptive arm and the visual target (the estimated arm) (Fig. 1B, see details of  
117 animal training and reward in Methods). In addition to this VP-conflict (VPC) task, two  
118 control experiments were conducted: (i) where the visual and proprioceptive  
119 information were perfectly aligned (VP task) and (ii) where there was only a  
120 proprioceptive signal (P task). The procedures of the three tasks (VPC, VP, and P) were  
121 essentially identical, except that the visual or proprioceptive information presented to  
122 monkeys varied according to the context of the experiment (see Methods). Using a  
123 block design, the order of three different blocks (tasks) in each training or recording  
124 session was randomized.

125

## 126 **Causal inference framework and monkey's behavior**

127 The hierarchical Bayesian causal inference (BCI) model encodes probability  
128 distributions over the two sensory (visual and proprioceptive) signals and incorporates  
129 rules that govern how a prior belief about the sensory causal structure is combined with  
130 incoming information to judge the event probability in proprioception. To examine  
131 whether the monkeys inferred the causal structure during multisensory processing, we  
132 first examined the proprioceptive drift as a function of disparity in the VPC task.  
133 Overall, the three monkeys showed a very consistent behavioral pattern, with the  
134 proprioceptive drift increasing for small levels of disparity and plateauing or even  
135 decreasing when the disparity became larger (e.g., exceeded 20°) (Fig. 1C; for data on  
136 individual monkeys, see Fig. S1). The BCI model qualitatively explains the nonlinear  
137 dependence of drift as a function of disparity. For small disparities, there is a high  
138 probability that the proprioceptive and visual signals came from the same source. Hence,  
139 the visual information is fully integrated with the proprioceptive information. For large  
140 disparities, however, it is likely that the proprioceptive and visual signals are from  
141 different sources, leading to a breakdown of integration and consideration of only the  
142 proprioceptive information (segregation). In this case, visual information has a weak  
143 weight in the integration. As a consequence, the effect of disparity on drift is reduced.  
144 The BCI model quantified the nonlinear dependence between disparity and  
145 proprioceptive drift to measure the posterior probability of a common source ( $P_{com}$ ), the  
146 consequence of cause inference. We fitted the behavioral data using the BCI model. The  
147 results showed two signatures of the  $P_{com}$  pattern: (i) the averaged  $P_{com}$  decreased as the  
148 disparity increased (Fig. 1D), and (ii) within each disparity, especially the large ones,  
149 the  $P_{com}$  decreased as the proprioceptive drift decreased (Fig. 1E) (see individual  
150 monkeys' behavior in Fig. S1).

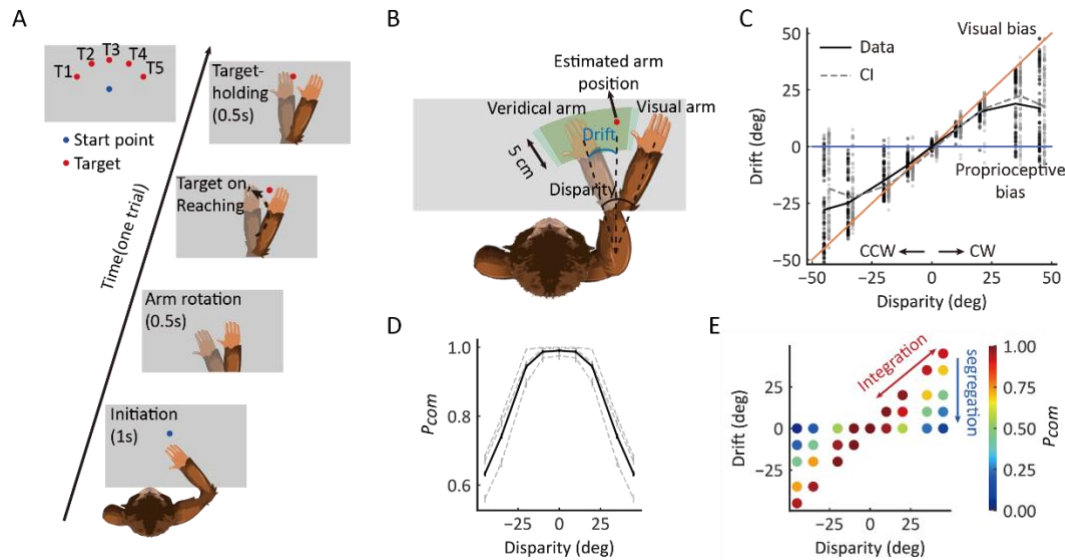

151

152 **Figure 1. Behavioral task and proprioceptive drift results.** (A) Overview of the behavioral  
 153 task. The monkey was instructed to hold its proprioceptive arm over the starting position (blue  
 154 dot) to initiate one trial. After the rotation of the virtual visual arm, a virtual red dot was  
 155 presented, and the monkey was required to place its proprioceptive arm on the target and hold  
 156 to get a reward. (B) Schematic drawing of reward area, proprioceptive drift, and the different  
 157 types of arms (veridical/proprioceptive and virtual/visual). Here, proprioceptive drift was  
 158 defined as the rotated degree from the veridical arm position to the estimated arm position (the  
 159 same as the target location) measured from the shoulder. The reward area is defined by the  
 160 green area, which ensured the monkey performed the task in a rational way and without visual  
 161 feedback (see animal training in Methods). (C) Example behavioral results from one session of  
 162 one monkey (also see Fig. S1). CCW, counterclockwise; CW, clockwise. The black line  
 163 represents raw data. The gray line represents the BCI model fitting result. (D) The average  $P_{com}$   
 164 as a function of disparity. The black line represents the average  $P_{com}$  across monkeys. The  
 165 dashed lines represent the average  $P_{com}$ s across sessions of three monkeys separately. Error  
 166 bars indicate standard errors of the means (SEMs). (E) Model prediction of the  $P_{com}$ . Each point  
 167 represents the average  $P_{com}$  in each cluster grouped by specific disparity and proprioceptive  
 168 drift according to the monkey's behavior.

169

170 More importantly, the model posits that not only the inference of the causal  
 171 structure is based on visual and proprioceptive inputs but also the subsequent updating  
 172 of (i) the prior belief of causal structure based on the historical information (e.g.,  
 173 probability of a common source in the previous trials), and (ii) the uncertainty of  
 174 sensory signals for the visual and proprioceptive recalibration (Fig. 2A). To test these  
 175 hypotheses, we first implemented the Markov analysis of the prior belief and  $P_{com}$  (see

176 Methods) to see whether the prior probability of a common source ( $P_{prior}$ ) in the current  
 177 trial depended on the historical  $P_{com}$  (Fig. 2B). The Markov model included the  
 178 transition probability of  $P_{prior}$  between the current ( $n^{\text{th}}$ ) and previous ( $n^{\text{th}} - 1$ ) trial to  
 179 account for the trial-by-trial variability in spatial drifts observed in the three monkeys  
 180 (Fig. 2B, left). The fit to the model demonstrated that the  $P_{com}$  observed in the  $n^{\text{th}}$  trial  
 181 was significantly affected by that in the previous ( $n^{\text{th}} - 1$ ) trial (Wilcoxon signed-rank  
 182 test,  $p < 0.001$ ), indicating that the  $P_{com}$  was computed on the basis of both  $P_{prior}$  from  
 183 the previous trial and the sensory inputs, with their disparity, from the current trial. Note  
 184 that the transition probabilities ( $P_{(C=1|C=1)}$  and  $P_{(C=1|C=2)}$ ) remained relatively high (larger than  
 185 0.8 in three monkeys) was because that overall the number of high  $P_{com}$  trial was much  
 186 more than low  $P_{com}$  trial in either training or recording sessions. This was consistent with  
 187 high baseline  $P_{prior}$  in three monkeys (Table S1).

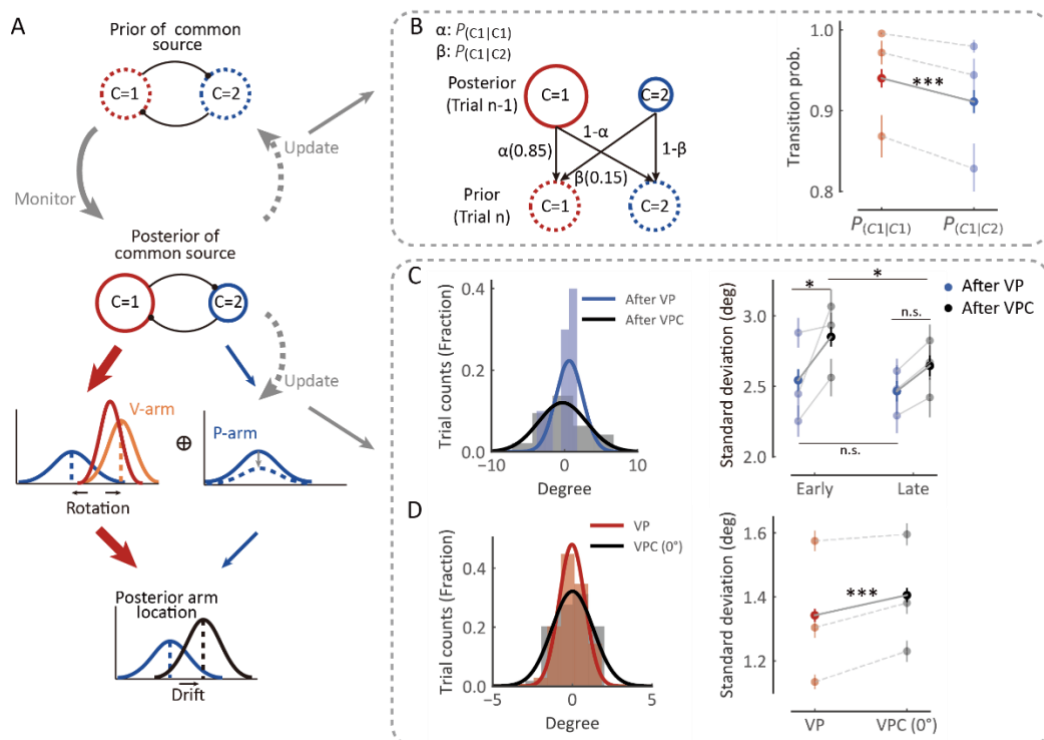

188  
 189 **Figure 2. Causal inference model predicts the dynamic updating of monkey's behavior.**  
 190 (A) Schematic drawing of the dynamic hierarchical causal inference model. V-arm, visual arm  
 191 signal; P-arm, proprioceptive arm signal; C=1, both V-arm and P-arm come from one common  
 192 source; C=2, V-arm and P-arm come from different sources. (B) Transition probability from



193 previous trial's  $P_{com}$  to current trial's  $P_{prior}$ . Left: the transition probability of an example  
194 session. Right: average transition probabilities across all sessions from three monkeys. The  
195 darker-colored points represent the average transition probabilities across monkeys. The  
196 lighter-colored points represent the average transition probabilities of the three monkeys  
197 separately (Wilcoxon signed-rank test,  $W = 6996.0$ ,  $p < 0.001$ ). (C) After-trial effect of sensory  
198 updating. Left: the distribution of arm locations in P blocks after VP and VPC tasks in an  
199 example session. The solid lines were fitted with Gaussian distributions. Right: the averaged  
200 standard deviations of drift in P blocks after VP and VPC tasks. The solid lines represent the  
201 averaged standard deviation of drift in VP and VPC ( $0^\circ$ ) across all sessions of all monkeys in  
202 early trials (Wilcoxon signed-rank test,  $W = 851.0$ ,  $p = 0.012$ , false-discovery rate [FDR]  
203 corrected) and in late trials (Wilcoxon signed-rank test,  $W = 1,024.0$ ,  $p = 0.073$ , FDR corrected).  
204 The uncertainty of P trials after the VPC task in the early part of the session was significantly  
205 larger than that in the later part (Wilcoxon signed-rank test,  $W = 917.0$ ,  $p = 0.035$ , FDR  
206 corrected); this is not the case for P trials after the VP task (Wilcoxon signed-rank test,  $W =$   
207  $1,086.0$ ,  $p = 0.15$ , FDR corrected). (D) Within-trial effect of sensory updating. Left: the  
208 distribution of arm locations in VP and VPC ( $0^\circ$ ) tasks. The solid lines were fitted with  
209 Gaussian distributions. Right: the average standard deviation of drift in VPC ( $0^\circ$ ) trials was  
210 significantly higher than that in VP trials (Wilcoxon signed-rank test,  $W = 10,035.0$ ,  $p < 0.001$ ).  
211 The dashed lines represent the average standard deviation of the drift in VP and VPC ( $0^\circ$ ) in  
212 each monkey. Error bars indicate SEMs; \* $p < 0.05$ ; \*\*\* $p < 0.001$ ; n.s., not significant.  
213

214 We next examined whether the sensory representation is updated to maintain  
215 consistency with the causal structure of the environment. That is, the estimates of  
216 physical arm locations should tradeoff in systematic ways depending on the current  
217 common-source belief (e.g.,  $P_{com}$  in different tasks: VP, P and VPC). For example, when  
218 the monkey incorrectly infers the visual and proprioceptive arms come from the same  
219 source when a disparity is presented, the uncertainty of proprioception should increase  
220 to “explain away” the conflict between the two inputs. According to this idea, since that  
221 the block design in the current experiment resulted in P trials (in the P task) sometimes  
222 following VPC task and other times following VP tasks, we then reasoned that because  
223 the overall  $P_{com}$  was lower in the VPC task than in the VP task, the uncertainty of  
224 proprioception (i.e., the distribution of proprioceptive drifts in the P trials) would be  
225 larger after the VPC task than after the VP task. We analyzed the drift variation in P

226 trials and found that, in the early trials (first third of each P block), the uncertainty of P  
227 trials following the VPC task was significantly larger than that following the VP task  
228 (Fig. 2C, Wilcoxon signed-rank test,  $p = 0.012$ ). The increase in the uncertainty of  
229 proprioception was recovered in the late trials (last third of each P block), evident by a  
230 significant difference in the uncertainty between early and late P trials (Fig. 2C,  
231 Wilcoxon signed-rank test,  $p = 0.035$ ). The decrease in the uncertainty of  
232 proprioception was reasonable, as the tradeoff effect in VPC task gradually recovered.

233 Furthermore, we hypothesized that if a tradeoff of sensory representation occurs  
234 during the process of causal inference, the tradeoff would also affect the uncertainty of  
235 VP integration in both VP and VPC tasks. We examined the distribution of  
236 proprioceptive drifts using the trials with  $0^\circ$  disparity in the VPC task, in which the V  
237 and P information were congruent, and compared it with the distribution in the VP task.  
238 As predicted, we found that the variance of the proprioceptive drift was significantly  
239 larger in the VPC task than in the VP task (Fig. 2D, Wilcoxon signed-rank test,  $p <$   
240  $0.001$ ). As a control, we also investigated whether the mean of drift, representing the  
241 accuracy of proprioceptive arm, was affected by the causal structure of the environment.  
242 We found there was no significant difference between the mean of drift for P trials  
243 following the VPC task and that following the VP task in both early part (Fig. S2, left,  
244 Wilcoxon signed-rank test,  $p = 0.37$ , FDR corrected) and late part (Fig. S2, right,  
245 Wilcoxon signed-rank test,  $p = 0.37$ , FDR corrected). Besides these, we also found that  
246 the mean of proprioceptive drift was not updated in the VPC task compared with VP  
247 task (Fig. S2 right, Wilcoxon signed-rank test,  $p = 0.29$ ). Thus, these results supported  
248 the notion of a tradeoff in proprioception according to causal inference environments;  
249 that is, the uncertainty, not the accuracy, of sensory representation is updated  
250 dynamically based on the task environment ( $P_{com}$ ).

251 To summarize the above-described behavioral results, first, we found that  
252 proprioceptive drift in monkeys shows a nonlinear dependency on the disparity between  
253 proprioceptive and visual input, which was well explained by the causal inference  
254 model. Second, we showed that the  $P_{com}$  integrated with visual-proprioceptive sensory  
255 inputs and is updated by historical information in a trial-by-trial basis. Third, to  
256 maintain a consistency of causal inference, sensory uncertainty, reflected by the  
257 variance of proprioceptive drift, is updated in the inference along with the change of  
258  $P_{com}$ . Taken together, we established the behavioral paradigm in which monkeys infer  
259 the hidden cause by integrating prior information and sensory inputs while dynamically  
260 updating both  $P_{com}$  and sensory representation. The behavioral responses of the  
261 monkeys enabled us to examine the underlying neural mechanisms and functional  
262 circuits.

263

#### 264 **Causal inference in individual premotor and parietal neurons**

265 We recorded from two brain regions, premotor cortex (475 neurons) and parietal cortex  
266 (area 5; 238 neurons), in the three monkeys performing the reaching tasks (Fig. 3A, for  
267 details, see Supplementary Materials). We first examined the neural representations of  
268 the visual and proprioceptive arm locations in each trial during the target-holding period  
269 in the VPC, VP, and P tasks (Fig. 3B). Both brain regions conveyed significant  
270 information about the arm location in the three tasks, as measured by a bias-corrected  
271 percent explained variance ( $\omega$ PEV) (Fig. 3C, Wilcoxon signed-rank test,  $p < 0.001$ ,  
272 FDR corrected; see Methods). In the VP and P tasks in which there are no visual-  
273 proprioceptive disparities, both premotor and parietal regions showed similar visual and  
274 proprioceptive arm information (Fig. 3C, left, VP arm, Wilcoxon rank-sum test,  $p =$   
275 0.97, FDR corrected; P arm, Wilcoxon rank-sum test, ,  $p = 0.49$ , FDR corrected).

276 However, when disparities were introduced in the VPC task, the premotor cortex  
 277 showed a stronger signal for visual arm information (Fig. 3C, right, Wilcoxon rank-sum  
 278 test,  $p < 0.001$ , FDR corrected), whereas parietal cortex showed stronger signals for  
 279 information related to the proprioceptive arm (Fig. 3C, right, Wilcoxon rank-sum test,  
 280  $p < 0.001$ , FDR corrected). This suggests that premotor and parietal regions may play  
 281 different roles during causal inference processing.

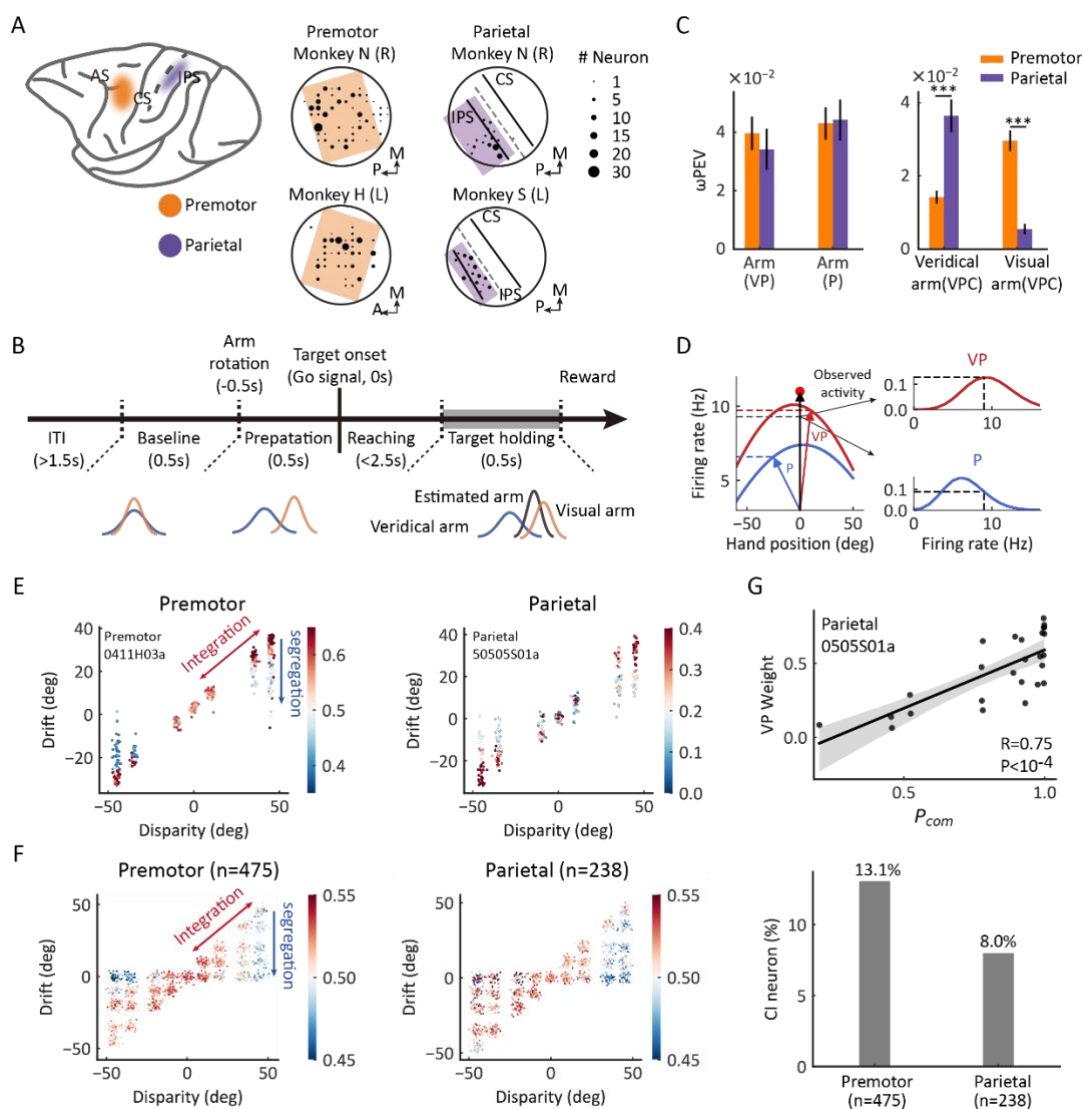

282  
 283 **Figure 3. Casual inference neurons in premotor and parietal cortices.** (A) Recording sites.  
 284 Left: two regions of interest were recorded through single electrodes in macaque monkeys.  
 285 Middle and right: specific recording sites in three monkeys. L, left hemisphere; R, right  
 286 hemisphere; A, anterior; P, posterior; M, medial. (B) Temporal structure of a single trial for the  
 287 VPC condition. (C) Neural information of arm locations in premotor and parietal cortices. Left:  
 288 No significant difference between the brain regions for the neural information of VP arm

289 (Wilcoxon rank-sum test,  $W = 0.040$ ,  $p = 0.97$ , FDR corrected) and P arm (Wilcoxon rank-sum  
290 test,  $W = -0.90$ ,  $p = 0.49$ , FDR corrected), respectively. Right: There were significant  
291 differences between the brain regions for both the neural information of Veridical arm  
292 (Wilcoxon rank-sum test,  $W = -5.32$ ,  $p < 0.001$ , FDR corrected) and Visual arm (Wilcoxon  
293 rank-sum test  $W = 5.68$ ,  $p < 0.001$ , FDR corrected) in VPC condition, respectively. Both brain  
294 regions conveyed significant information about the arm location in the three tasks (PMC: VP  
295 arm, Wilcoxon signed-rank test,  $W = 38,146.0$ ,  $p < 0.001$ , FDR corrected; P arm, Wilcoxon  
296 signed-rank test,  $W = 34,983.0$ ,  $p < 0.001$ , FDR corrected; Veridical arm (VPC), Wilcoxon  
297 signed-rank test,  $W = 35,062.0$ ,  $p < 0.001$ , FDR corrected; Visual arm (VPC), Wilcoxon signed-  
298 rank test,  $W = 22,226.0$ ,  $p < 0.001$ , FDR corrected. Area5: VP arm, Wilcoxon signed-rank test,  
299  $W = 9,390.0$ ,  $p < 0.001$ , FDR corrected; P arm, Wilcoxon signed-rank test,  $W = 7,324.0$ ,  $p <$   
300  $0.001$ , FDR corrected; Veridical arm (VPC), Wilcoxon signed-rank test,  $W = 3,552.0$ ,  $p < 0.001$ ,  
301 FDR corrected; Visual arm (VPC), Wilcoxon signed-rank test,  $W = 10,483.0$ ,  $p < 0.001$ , FDR  
302 corrected). Error bars indicate SEMs. **(D)** Schematic drawing of VP weight analysis (see  
303 Methods) in one example trial for the VPC condition. **(E)** Two examples of causal inference  
304 neurons in premotor and parietal cortices during the target-holding period. Each point  
305 represents one single trial, and the color represents the value of VP weight. **(F)** Population  
306 causal inference patterns in two brain regions. Each point was a pseudo-trial that was generated  
307 through bootstrapping, and the color represents the value of VP weight. **(G)** An example neuron  
308 in parietal cortex showing the causal inference pattern defined by a significant positive  
309 correlation between VP weight and  $P_{com}$  (Pearson's correlation). Each point represents the  
310 average  $P_{com}$  and VP weight in a cluster from the behavioral  $P_{com}$  pattern. The solid line was  
311 fitted with linear regression, and the shaded area indicates the 95% confidence interval. The bar  
312 plot represents the fraction of causal inference neurons in premotor (13.1%, One sample Z-test,  
313  $Z = 5.21$ ,  $p < 0.001$ ) and parietal (8.0%, One sample Z-test,  $Z = 1.70$ ,  $p = 0.045$ ) cortices which  
314 were significantly higher than chance level (5%), respectively. There was a significant  
315 difference between the brain regions (Pearson's chi-square test,  $\chi^2 = 3.89$ ,  $p = 0.049$ ). \*\*\*  $p <$   
316  $0.001$ .

317

318 To further quantify neural information about causal inference in the VPC task at  
319 the single-neuron and single-trial levels, we utilized the VP and P tasks to characterize  
320 neural responses, as these tasks involve expected stereotypical behaviors in the two  
321 extreme regimes: full integration and segregation. Thus, neurons that are more active  
322 during the VP task reflect a preference for integrating congruent VP information and,  
323 hence, constitute a natural candidate for “integration (VP) neurons”. By contrast,  
324 neurons that are more active during the P task are likely candidates for “segregation (P)  
325 neurons”. We then implemented a linear probabilistic model which combined how the

326 neural response pattern aligned with the VP and P response profiles and used this model  
327 to implement a probabilistic decoding analysis to calculate the probability of VP or P  
328 (VP weight =  $P_{vp}/[P_{vp} + P_p]$ ) on the basis of the firing rate in each trial (Fig. 3D, also  
329 see Methods). Thus, for a single trial, a larger VP weight denotes a higher probability  
330 of integration (high  $P_{com}$ ). We first focused on the target-holding period in a trial, as the  
331 neurons could well display their spatial tunings when monkeys holding their arms on  
332 the target. We found that both premotor and parietal regions carry information about  
333  $P_{com}$  at the single-neuron level during the target-holding period (Fig. 3E and F). That is,  
334 the VP weight of the neuron or population progressively decreased along with the  
335 disparity, and in trials with large disparity (e.g., 35° and 45°), the neuron(s) had a higher  
336 VP weight when the drift was large (i.e., the monkey integrated the visual information;  
337 thus, a high  $P_{com}$  predicted by the BCI model) and shifted gradually toward higher P  
338 weights when the drift shifted to 0 (i.e., the monkey segregated the visual information;  
339 thus, a low  $P_{com}$  predicted by the BCI model). The VP weight was highly correlated  
340 with the  $P_{com}$  from behavior (Fig. 3G). Note that premotor cortex had a slightly higher  
341 proportion of causal inference neurons (13.1%) than parietal cortex (8.0%, Pearson's  
342 chi-square test,  $\chi^2 = 3.89$ ,  $p = 0.049$ ).

343

#### 344 **Population states encode $P_{com}$ during causal inference**

345 We next focused on the overall populations of neurons in both regions and asked  
346 whether and how their population states reflect the uncertainty of causal structure,  $P_{com}$ .  
347 We were guided by the results from single-neuron analyses during the target-holding  
348 period described above, in which neurons responsive to high  $P_{com}$  (prefer integration)  
349 are more likely to show neural tuning similar to that during the VP task, and neurons  
350 responsive to low  $P_{com}$  (prefer segregation) show a tuning profile similar to that in the

351 P task. We thus hypothesized that there are neural components or subspaces embedded  
352 in the population activity that represent the dynamic change in the coding of  $P_{com}$  in the  
353 VPC task, which would lie between the components representing the VP and P profiles.  
354 Furthermore, the computation of  $P_{com}$  in the BCI model is determined by the relation  
355 and disparities between the visual information from the artificial arm and  
356 proprioceptive information from the monkey's actual arm. In other words, according to  
357 the model, the causal inference can be constructed before the visual target appears, and  
358 the participant uses this information to guide the reach. We thus further hypothesized  
359 that the dynamics of the population states also reflect the  $P_{com}$  during the preparation  
360 period, during which there is no motor planning or preparation.

361 Thus, we grouped trials from each neuron into high and low  $P_{com}$  classes according  
362 to the drift under each disparity (high, top third of the trials [in red]; low, bottom third  
363 of the trials [in blue]) (Fig. 4A). We conducted demixed principal component analysis  
364 (dPCA) to visualize any neural component that represents the  $P_{com}$  in the VPC task in  
365 relation to that in the VP and P tasks (see Methods). dPCA decomposes population  
366 activity into a set of dimensions that each explain the variance of one factor of the data  
367 (Kobak et al., 2016). We included the factors of time, arm location, and  $P_{com}$  (Fig. 4B).  
368 In the analysis, VP and P trials were included, which served as the templates of  
369 integration and segregation, respectively. As shown in the schema (Fig. 4B), if the  
370 decomposed neural components indeed represent the  $P_{com}$ , the population activity of  
371 high and low classes in this subspace should lie between that of the VP and P classes  
372 and the four classes (high, low, VP, and P) should be separated from each other. The  
373 dPCA results indicated that the  $P_{com}$  components, which were unrelated to the arm  
374 location, represented 29.9% and 20.5% of the total firing rate variance in the premotor  
375 and parietal areas, respectively (Fig. 4C, in red). Importantly, the activity in  $P_{com}$



376 dimensions seems consistent with our hypothesis, demonstrating the dynamics of  $P_{com}$   
377 between integration (VP) and segregation (P). In addition, compared to the activity in  
378 parietal cortex, the neural trajectories of the premotor populations showed an earlier  
379 divergence in  $P_{com}$  dimensions (Fig. 4D).

380 To further quantify their dynamics in a statistical manner, we trained a linear  
381 support vector machine (SVM) using pooled activities in each brain region through the  
382 entire trial. The dynamic decoding results showed that the  $P_{com}$  information is correctly  
383 predicted by neuronal population activities in both regions after target onset but is  
384 decoded only by premotor neurons during the preparation period, when there was no  
385 visual target or motor preparation (Fig. 4E, cluster-based permutation test,  $p < 0.05$ ).  
386 This may suggest that the premotor cortex is where causal inference is computed and  
387 sends the information to parietal cortex during the reaching period.



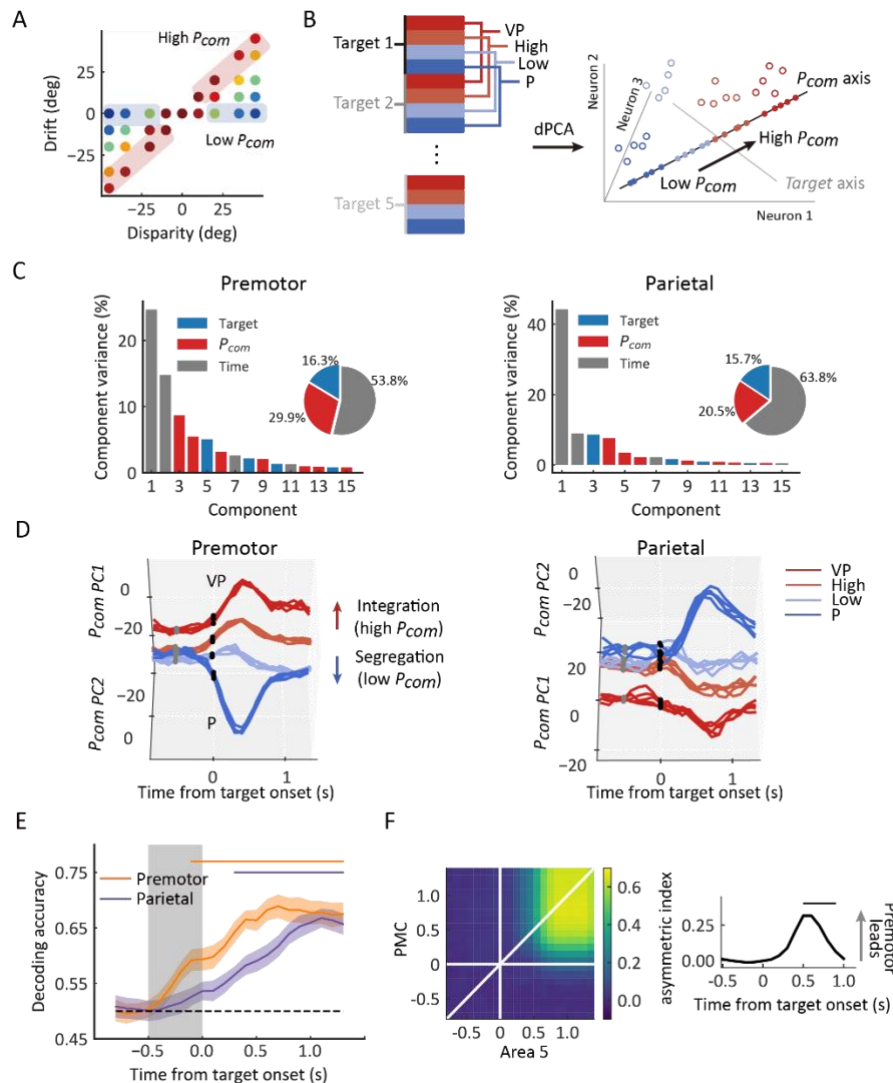

388

389 **Figure 4. Dynamic population decoding of  $P_{com}$ .** (A) Schematic drawing of the high  $P_{com}$   
 390 group (top third of trials) and the low  $P_{com}$  group (bottom third of trials) based on the relative  
 391 drift (drift/disparity). (B) Schematic drawing of the dPCA. All trials of each neuron were  
 392 grouped into 20 classes (5 targets  $\times$  4 conditions, including VP and P tasks and high and low  
 393 groups in the VPC task). The marginalization matrix was generated by averaging all trials in  
 394 each class. (C) dPCA decomposes population activity into a set of components given the task  
 395 parameters of interest. (D) Temporal evolution of dPCA components of  $P_{com}$ . The gray points  
 396 represent the disparity onset; the black points represent the target onset. (E) Population  
 397 decoding of  $P_{com}$ . The decoding accuracy was plotted as a function of time. The gray shaded  
 398 area represents the preparation period. The horizontal dashed black line represents the chance  
 399 level. The horizontal solid colored lines at the top represent the time of significant decoding  
 400 accuracy (cluster-based permutation test,  $p < 0.05$ ). Shaded areas indicate 95% confidence  
 401 intervals. (F) jPECC results averaged across all sessions. Left: x-axis represents the time of  
 402 Parietal (Brodmann Area 5) from target onset; y-axis: represents the time of Premotor (PMC)  
 403 from target onset. The color bar represents the cross-validated correlation coefficient. Right:  
 404 lead-lag interactions as a function of time relative to target onset. The horizontal black line

405 represents the time of significant jPECC asymmetry index versus shuffled data (cluster-based  
406 permutation test,  $p < 0.05$ ).

407

408       Next, we tested the relationship between the population activities in the two areas.

409 We performed a joint peri-event canonical correlation (jPECC) analysis, which detects  
410 correlations in a “communication subspace” between two brain regions (Steinmetz,  
411 Zátka-Haas, Carandini, & Harris, 2019). In brief, we conducted a canonical correlation  
412 analysis for every pair of time points containing the population neural firing rates from  
413 the two regions. If the shared neural activity emerges at different times in the two  
414 regions, that is, activity in one region potentially leads to activity in the other one, then  
415 we should observe a temporal offset between them. The jPECC results revealed a  
416 significant time lag for activity correlations between premotor and parietal areas in  $P_{com}$   
417 dimensions (Fig. 4F, cluster-based permutation test,  $p < 0.05$ ), suggesting a potential  
418 feedback signal of  $P_{com}$  from premotor cortex to parietal cortex. As a control, we  
419 performed the same procedure with misalignment trials (see Methods) to exclude the  
420 probability that the observed time lag resulted from the intrinsic temporal property of  
421 neuronal activities in these regions. There was no significant time lag between premotor  
422 and parietal areas when the trials were misaligned (Fig. S3).

423

#### 424 **History-dependent $P_{com}$ in premotor cortex**

425 The behavioral experiments showed that the  $P_{com}$  can be updated by previous sensory  
426 experience in a trial-by-trial basis. To test the effect of the historical  $P_{com}$  on the causal  
427 inference in each trial, we examined neural activities during the baseline period in the  
428 VPC task, before a disparity in the visual and proprioceptive arm is introduced (Fig.  
429 5A). We again classified the trials according to high and low  $P_{com}$ . Figure 5A depicts  
430 the results from an example premotor neuron, showing that during the baseline period  
431 the neural activity exhibited selectivity toward the previous trial’s  $P_{com}$ , and at the same

432 time its neural trajectories in high and low prior classes lied between the VP and P  
 433 templates. Of 475 neurons in premotor cortex, 39 (8.2%) showed such selectivity to the  
 434 previous trial (Fig. S4).

435 To further test the relation between baseline neural activity and behavior in a  
 436 quantitative manner, we examined whether the population activities of these neurons  
 437 can predict the  $P_{com}$  from previous trials. We trained an SVM using pooled activities  
 438 across recording sessions. The historical  $P_{com}$  information was only correctly decoded  
 439 from the baseline activity in premotor cortex (Fig. 5B, cluster-based permutation test,  
 440  $p < 0.05$ ). Moreover, only recent historical information ( $n^{\text{th}} - 1$  trial) had a significant  
 441 impact on the current trial (Fig. 5C, permutation test,  $p < 0.001$ ).

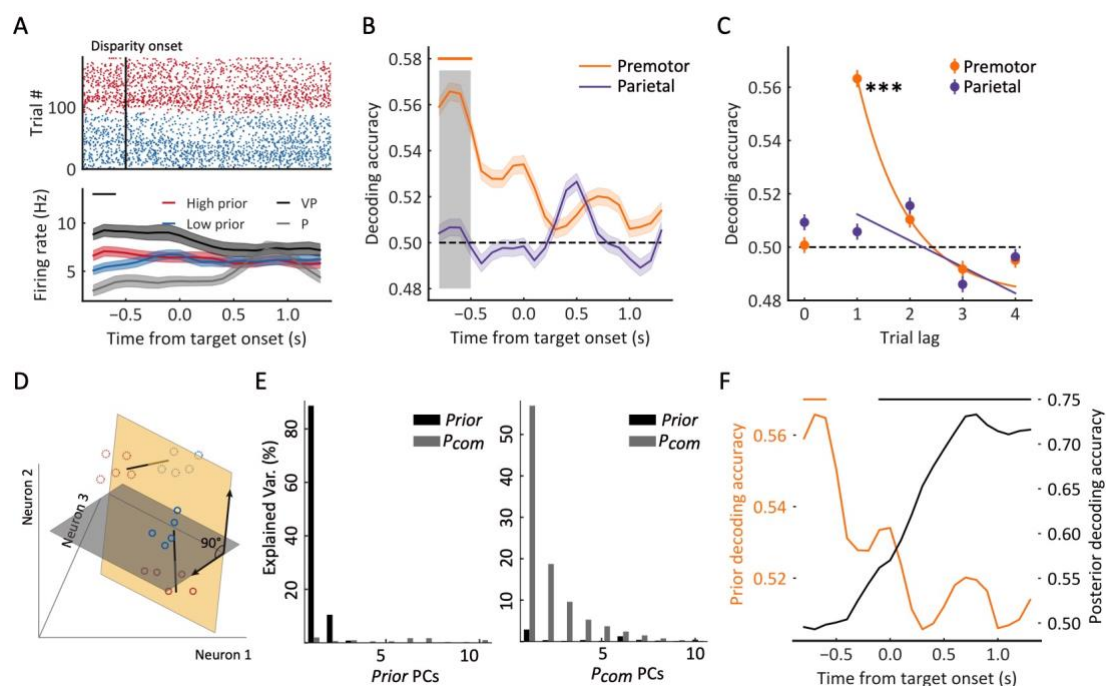

442 **Figure 5. Premotor neurons encode prior information (previous trial's  $P_{com}$ ) during the**  
 443 **reference period.** (A) Example neuron in premotor cortex showing selectivity to prior  
 444 information during the baseline period. The trials in the raster plot were sorted by the  $P_{com}$   
 445 in the previous trial and grouped into high (red dots) and low (blue dots) groups. Bottom:  
 446 temporal evolution of the average firing rate of “high prior” and “low prior” groups. The black horizontal  
 447 line at the top represents the time window with a significant difference (two-sided  $t$  test,  $t =$   
 448 2.36,  $p = 0.019$ ). Shaded areas indicate SEMs. (B) Dynamic population decoding of prior  
 449 information ( $n^{\text{th}} - 1$  trial). The gray shaded window represents the reference period. The  
 450 horizontal solid colored line at the top represents the time with significant decoding accuracy  
 451

452 with a cluster-based permutation test ( $p < 0.05$ ). Shaded areas indicate 95% confidence  
453 intervals. The horizontal dashed black line represents the chance level. **(C)** Decoding accuracy  
454 of prior trials ( $n^{\text{th}} - 1$  to  $n^{\text{th}} - 4$ ). Lag 0 represents the decoding of  $P_{com}$  in the current ( $n^{\text{th}}$ ) trial.  
455 The horizontal dashed black line represents the chance level (permutation test,  $p < 0.001$ ). The  
456 solid lines were fitted with exponential distributions. Error bars indicate 95% confidence  
457 intervals. **(D)** Schematic drawing of orthogonal subspaces of  $P_{prior}$  and  $P_{com}$ . The solid-line  
458 circles represent  $P_{com}$  and dotted circles represent  $P_{prior}$ . Red represents high  $P_{com}$ , blue  
459 represents low  $P_{com}$ . **(E)** Left: percentage of baseline-period ( $P_{prior}$ ) data variance (black bars,  
460 explained variance: about 99.9%) and target-holding period data variance (gray bars, explained  
461 variance: about 10.8% ) explained by the top ten prior PCs. Right: percentage of baseline-period  
462 ( $P_{prior}$ ) data variance (black bars, explained variance: about 13.9%) and target-holding ( $P_{com}$ )  
463 period data variance (gray bars, explained variance: about 99.9%) explained by the top ten  $P_{com}$   
464 PCs. **(F)** Premotor encoded prior information during the reference period quickly decreased  
465 after the disparity onset while the  $P_{com}$  information emerged. The orange line represents the  
466 population decoding accuracy of  $P_{prior}$  ( $n^{\text{th}} - 1$  trial). The black line represents the population  
467 decoding accuracy of  $P_{com}$ . The orange and black horizontal solid colored lines at the top  
468 represent the time with significant decoding accuracy with a cluster-based permutation test ( $p$   
469  $< 0.05$ ) for prior information and  $P_{com}$  information, respectively. \*\*\*  $p < 0.001$ .  
470

471 As both  $P_{prior}$  and  $P_{com}$  were represented in premotor neural activities, we wanted  
472 to examine their relationship in the neural states. We first found that there were very  
473 few neurons that responded to both information types (see Fig. S4). We then  
474 hypothesized that  $P_{prior}$  and  $P_{com}$  may be represented independently at a population level.  
475 To validate this hypothesis, we conducted PCA on the population activities during  
476 baseline and target-holding periods for  $P_{prior}$  and  $P_{com}$ , respectively. If they are  
477 independent, the subspaces of  $P_{prior}$  and  $P_{com}$  will be near orthogonal, and the PCs of  
478  $P_{prior}$  and  $P_{com}$  will capture little variance of each other (Elsayed, Lara, Kaufman,  
479 Churchland, & Cunningham, 2016). To quantify this, we projected the  $P_{prior}$  data onto  
480 the  $P_{com}$  subspace to calculate the percent variance explained by the  $P_{com}$  PCs and  
481 repeated the same procedure for the  $P_{com}$  data (Fig. 5D). The results show that the top  
482 ten  $P_{prior}$  PCs captured very little  $P_{com}$  variance, and similarly, the top ten  $P_{com}$  PCs  
483 captured very little  $P_{prior}$  variance (Fig. 5E) . These results support the hypothesis that  
484 the two information types are represented independently in premotor cortex. However,

485 such independency between  $P_{com}$  and  $P_{prior}$  could also be caused by their different  
486 temporal structures in the task. Thus, we examined their neural dynamics within a trial.  
487 Figure 5F shows the time course of decoding results of prior and posterior information,  
488 where the  $P_{prior}$  quickly decreased after the disparity onset, and at the same time, the  
489  $P_{com}$  information increased and was retained until the end of the trial. These results  
490 demonstrated the dynamics in the computation of causal inference, where the  
491 information from the last trial is only preserved transiently and then used to integrate  
492 with sensory inputs to generate  $P_{com}$  information.

493

#### 494 **Update sensory uncertainty of arm location in parietal cortex (area 5)**

495 Finally, we investigated the neural activities associated with the updating of sensory  
496 uncertainty. The behavior results revealed a significantly greater uncertainty of  
497 proprioception in VP trials in the VPC task (low belief of a common source) than in the  
498 VP task (high belief of a common source) (Fig. 2C). We hypothesized that the sensory  
499 signals, which were used to make causal inference, in turn, updated their neuronal  
500 tunings to match inferred causal structure. We first examined the difference in neural  
501 tuning for arm location using the VP trials in the VP and VPC (trials with no disparity)  
502 tasks. Fig. 6A (right) shows an example neuron from the parietal cortex tuned to the  
503 center ( $0^\circ$ ) of arm location during reaching in the VP task, and the tuning  
504 range/uncertainty of the arm location was broader/lower in the VPC task. Here, for  
505 visualization purpose, we selected the time point when this neuron demonstrated the  
506 highest difference of  $\omega_{PEV}$  in the VP trials between VP and VPC tasks for the tuning  
507 calculation (Fig. 6A, left, peak delta  $\omega_{PEV}$ ). The averaged dynamic spatial selectivity  
508 of all neurons revealed a significant decrease of the total spike rate variance explained  
509 by the arm location in the parietal cortex but not in the premotor cortex (Fig 6B, cluster-

510 based permutation test,  $p < 0.05$ ). Furthermore, at the population level, we performed  
 511 the SVM decoding analysis of arm locations and found that only parietal cortex showed  
 512 a significantly decreased decoding accuracy in the VPC task (Fig 6C, cluster-based  
 513 permutation test,  $p < 0.05$ ). We also confirmed that the change of decoding accuracy  
 514 in the parietal cortex was significantly larger than the change in the premotor cortex  
 515 (two-way ANOVA, Condition (*VP* and *VPC 0°*)  $\times$  Region (*parietal* and *premotor*),  
 516 significant interaction effect,  $p < 0.05$ ).  
 517

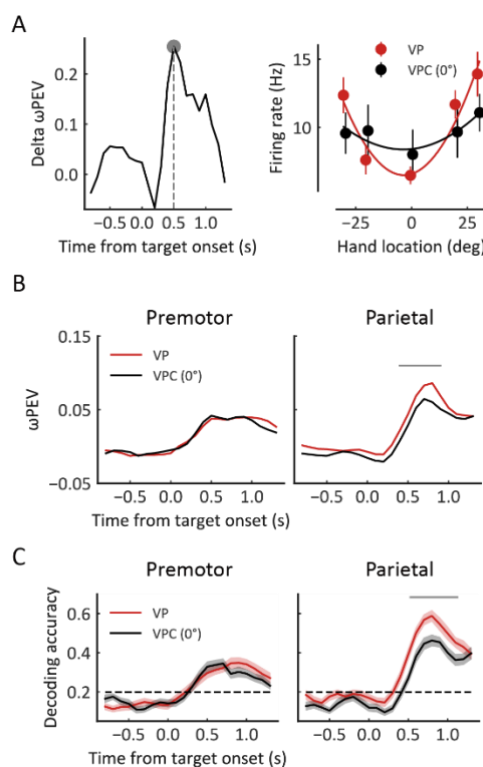

518  
 519 **Figure 6. Representation of arm location is updated in parietal cortex.** (A) Left: The  
 520 difference of  $\omega$ PEV between VP and VPC (0°) conditions for an example neuron in parietal  
 521 cortex. Right: Snapshot of the arm location tuning for VP and VPC (0°) conditions at the time  
 522 point showed in the left panel (peak delta  $\omega$ PEV). The solid curves were fitted with a von Mises  
 523 distribution. (B) Dynamic average  $\omega$ PEV for VP and VPC (0°) conditions. The horizontal line  
 524 at the top represents the time bins in which the  $\omega$ PEV for the VPC (0°) condition was  
 525 significantly lower than that for the VP condition (cluster-based permutation test,  $p < 0.05$ ). (C)  
 526 Dynamic population decoding of arm locations. The horizontal line at the top represents the  
 527 time bins in which the decoding accuracy for the VPC (0°) condition was significantly lower  
 528 than that for the VP condition (cluster-based permutation test,  $p < 0.05$ ). Shaded areas indicate  
 529 95% confidence intervals. The horizontal dashed black lines represent the chance level.



530 **DISCUSSION**

531 Our data of behavior and multi-area neural recordings revealed, for the first time, the  
532 dynamic computation of causal inference in the frontal and parietal regions at single-  
533 neuron resolution during multisensory processing. Complementary to the previous  
534 findings focused on the feedforward sequential processing of BCI, the present results  
535 demonstrate parallel top-down processing of the hidden variable of  $P_{com}$  from the  
536 premotor cortex, which monitors the weights of sensory combinations in the parietal  
537 cortex. By resolving the historical information and causal belief, the hidden causal  
538 structure and sensory representation are dynamically updated in the premotor and  
539 parietal cortices, respectively.

540 In the last 15 years, the BCI model has been extended to account for a large number  
541 of perceptual and sensorimotor phenomena and vast behavioral data(Shams &  
542 Beierholm). Recent studies have begun to map the algorithms and neural  
543 implementation in the human brain. Noninvasive human functional magnetic resonance  
544 imaging studies revealed a neural correlation to causal inference in parietal cortex, and  
545 magnetoencephalography showed that frontal neural activities are also involved in  
546 causal inference(Cao et al., 2019; Rohe et al., 2019; Rohe & Noppeney, 2015, 2016).  
547 However, at the single-neuron level, very few studies have examined the neural  
548 mechanism in animals. More importantly, none of the human studies have investigated  
549 the neural representation of the hidden variable,  $P_{com}$ . How the prefrontal-parietal  
550 circuits contribute to the encoding and updating of  $P_{com}$  has not been explored. Our  
551 results reconciled and extended previous findings by showing that  $P_{com}$  is successively  
552 represented by premotor and parietal neural activities. Unlike previous human imaging  
553 studies, which used the final behavioral estimation as the index of causal inference(Cao  
554 et al., 2019; Rohe et al., 2019), our study directly examined the neural representation

555 and dynamics of the hidden variable  $P_{com}$  at single-neuron and neural population levels.  
556 We showed that, even within a trial, the inference of a common source was dynamic.  
557 We thus propose a dynamic flow of information processing during causal inference,  
558 where the  $P_{com}$  is estimated from the information of sensory uncertainties and the  
559 disparity between them in the premotor cortex and then used for later sensory  
560 integration or segregation (model weighted average)(Kording et al., 2007); finally,  
561 these signals are maintained in the premotor-parietal circuit to guide the reaching  
562 behavior.

563 Historical experiences create our prior beliefs of the surrounding environment. It  
564 was proposed that various cognitive functions, such as sensory perception, motor  
565 control, and working memory, can be modulated by historical perception(Akrami,  
566 Kopec, Diamond, & Brody, 2018; Ernst & Banks, 2002; Rao, DeAngelis, & Snyder,  
567 2012). Computationally, historical modulation can be well understood within the  
568 Bayesian framework(Kording & Wolpert, 2004). For instance, by imposing the BCI  
569 model in the present study, we showed that prior knowledge of a common source is  
570 updated by the hidden probability of the common source ( $P_{com}$ ) in the previous trial and  
571 then integrated with the sensory inputs in a Bayesian manner. The feedback from a  
572 posterior signal is one of the signatures of a hierarchical recurrent Bayesian model in a  
573 recurrent neural network(Darlington, Beck, & Lisberger, 2018). Furthermore, the  
574 posterior signal enables the construction of the causal inference environment, which  
575 can modulate sensory processing in lower-level sensory areas (e.g., parietal cortex)  
576 through a top-down feedback mechanism to maintain the belief of the causal structure.  
577 Therefore, our results provide the first behavioral and neural evidence in animals that  
578 the frontal-parietal circuit represents the hierarchical Bayesian inference and  
579 dynamically updates the causal structure and sensory representation to support the



580 causal inference during multisensory processing.

581 Previous research over the past two decades has revealed that even the perceptions  
582 of body ownership and agency are remarkably malleable and involve continuous  
583 processing of multisensory information and causal inference (Kilteni, Maselli, Kording,  
584 & Slater, 2015; Legaspi & Toyozumi, 2019). Thus, our study provides unique data  
585 toward an understanding of self-relative awareness (e.g., bodily self-consciousness) in  
586 macaque monkeys, showing neural implementation of causal inference at the neural  
587 circuit level. We also identified the hidden components of causal inference in the  
588 parietal and premotor cortices of macaque monkeys by using a visual-proprioceptive  
589 task. This is important, because, unlike most sensory cognitive functions, the subjective  
590 perceptions of body ownership and agency cannot be directly measured from explicit  
591 reports from animals. Using the BCI model and neural activities recorded from multiple  
592 brain areas, we now are able to begin exploring body ownership and agency  
593 qualitatively by examining the hidden variable in both behavior and neural  
594 representations.

595 In the BCI framework, there are two key components, inferring the hidden  
596 variables (e.g.,  $P_{com}$ ) and updating the causal structure and sensory representation. We  
597 have suggested that the representation and core computation of the hidden common  
598 source most likely takes place in the premotor cortex (Ehrsson & Chancel, 2019; Fang  
599 et al., 2019), which is consistent with findings for body awareness in humans (Blanke,  
600 Slater, & Serino, 2015; Ehrsson, Spence, & Passingham, 2004). The posterior belief of  
601 a common source is calculated using a Bayesian approach by integrating prior  
602 knowledge and sensory entities, and theoretically, these components should be  
603 dynamically updated at different time hierarchies. For example, the prior configuration  
604 of the body, known as the body schema in psychology, constrains the possible

605 distribution of the body states but is dynamically updated when the context changes to  
606 maintain consistency between the internal body model and sensory inputs (e.g., rubber  
607 hand illusion or body illusion)(Botvinick & Cohen, 1998; Kilteni et al., 2015).  
608 Pathological impairment in inferring the sensory source can result in  
609 somatoparaphrenia, in which the patient declares that his or her body part belongs to  
610 another person despite the visual and proprioceptive signals from the common source  
611 of their own body(Keromnes et al., 2019). Similarly, schizophrenia patients suffering  
612 from delusions of agency have shown impairments in updating their internal causal  
613 structures. They show a deficit in the ability to detect the source of their thoughts and  
614 actions and thus incorrectly attribute them to external agents(Haggard, 2017). Therefore,  
615 although we demonstrated the neural representations and their updating by using the  
616 multisensory and reaching task in monkeys, the computational mechanism and  
617 underlying neural circuits might contribute to learning and inference in any task that  
618 relies on causal inference.

619

## 620 **ACKNOWLEDGMENT**

621 We thank Florent Meyniel and Tianming Yang for their comments on the manuscript,  
622 and Xinjian Jiang, Jian Jiang, and Juntao Feng for experimental assistance. This work  
623 was supported by the Strategic Priority Research Programs XDB32070200 and  
624 XDB32010300, the CAS Pioneer Hundreds of Talents Program, the Shanghai  
625 Municipal Science and Technology Major Project 2018SHZDZX05, and the Shanghai  
626 Key Basic Research Project 16JC14202001 to L.W.

627

628

629

## 630 **METHODS AND MATERIALS**

### 631 **Experimental model and subject details**

632 All animal procedures were approved by the Animal Care Committee of Center for  
633 Excellence in Brain Science and Intelligence Technology, Institute of Neuroscience,  
634 Chinese Academy of Sciences, and were described previously in detail (Fang et al.,  
635 2019). Briefly, three male adult rhesus monkeys (*Macaca mulatta*; monkey H, N, and  
636 S, weighting 6–10 kg) participated in the experiment. During the experiment, the  
637 monkeys were seated comfortably in the monkey chairs and their heads were fixed. All  
638 monkeys were implanted with chambers for recordings.

639

### 640 **Method details**

641 Some of the following methods are similar to those previous published (Fang et al.,  
642 2019).

### 643 **Apparatus**

644 The monkeys were seated in front of a chest-height table on which a lab-made virtual  
645 reality system was placed (Fang et al., 2019). During the entire experiment, the  
646 monkey's left arm (and the right arm in the case of Monkey H, who was right handed)  
647 was placed on the system and blocked from sight. A CCD camera (MV-VEM120SC;  
648 Microvision Co., China) captured the image of the monkey's arm reflected in a 45°  
649 mirror. This image was projected to the rear screen by a high-resolution projector (BenQ  
650 MX602, China). Therefore, when the monkey looked in the horizontal mirror  
651 suspended between the screen and the table, the visual arm image appeared to be its  
652 real arm on the table. The lower edge of the screen was aligned to the table edge. The  
653 monkey's trunk was close to the edge of the table, and the left shoulder was aligned  
654 with the midline of the screen. By using the OpenCV graphics libraries in C++ (Visual  
655 Studio 2010; Microsoft Co., WA, USA), the arm image and the visual target were  
656 generated and manipulated. By using CinePlex Behavioral Research Systems (Plexon  
657 Inc., TX, USA), sampled at 80 Hz, the hand position was tracked and recorded. The  
658 tracking color marker was painted onto the monkey's first segment of the middle finger,  
659 which was not visible after adjusting the light exposure settings of the video.

### 660 **Behavioral task procedures**

661 The monkey was trained to report its proprioceptive arm location by reaching for a  
662 target in a visual-proprioceptive causal inference task (Fig. 1A) (Fang et al., 2019). The  
663 monkey initiated a trial by placing its hand on the starting point (a blue dot with a 1.5-  
664 cm diameter) for 1,000 ms and was instructed not to move. After the initiation period,  
665 the starting point disappeared and the visual arm was rotated (within one video frame,  
666 16.7 ms) for the visual-proprioceptive conflict (VPC) condition, and the rotation was  
667 maintained for 500 ms (the preparation period). After that, the reaching target was  
668 presented as a “go” signal. The monkey had to reach the target (chosen from T1 to T5

669 randomly trial by trial [Fig. 1A]) within 2,500 ms and hold its hand in the target area  
670 (see as follows) for 500 ms to receive a drop of juice as the reward. Any arm movement  
671 during the target-holding period automatically terminated the trial. The rotated arm was  
672 maintained throughout the entire trial along with the arm movement. The intertrial  
673 interval (ITI) was  $\sim 1.5$ – $2$  s, after which the monkey was allowed to start the next trial.  
674 During the ITI, the visual scene was blank. Under the VPC condition, across trials, the  
675 visual arm was randomly presented with a disparity of  $0^\circ$ ,  $\pm 10^\circ$ ,  $\pm 20^\circ$ ,  $\pm 35^\circ$ , or  $\pm 45^\circ$  (+,  
676 clockwise [CW]; –, counterclockwise [CCW] direction) from the subject's  
677 proprioceptive arm, with its shoulder as the center point. The starting point was fixed  
678 25 cm away from the monkey's shoulder. The target position was selected randomly  
679 trial by trial from one of five possible positions located on an arc (a  $\pm 4^\circ$  jitter was added  
680 to the original position trial by trial to ensure the monkey did not perform the task by  
681 memorizing all the target positions.

682 Besides the VPC condition, the monkey also was instructed to perform a vision-  
683 proprioception (VP) congruent task and proprioception-only (P) task during the  
684 recording session. The only difference between the VPC and VP condition was that  
685 during the entire trial under the VP condition, the visual arm was always congruent with  
686 the proprioceptive arm. The only difference between VP and P conditions was that  
687 during the single-trial for the P condition, the visual arm information was blocked  
688 starting from the onset of the preparation period.

689 Each VPC block contained 55 trials in which the 9 disparities and 5 targets were  
690 randomly combined. Each VP and P block contained 27 trials in which 5 targets  
691 randomly occurred in every single trial. In one recording session, typically one or two  
692 P blocks were given first to ensure that the monkey performed the task with its  
693 proprioceptive arm, and then in the following blocks, VP, P, and VPC conditions were  
694 randomly mixed. One recording session contained more than 3 VP and P blocks and  
695 more than 8 VPC blocks.

### 696 **Target (with reward) area**

697 To ensure the monkeys indeed performed the reaching-to-target task with their  
698 proprioceptive hand, under the VPC condition, the reaching target area (with reward)  
699 was defined as follows: the radial distance from the hand to the center of the target was  
700 less than 5 cm to ensure that the monkey did reach out to the target; with the target as  
701 the center, the azimuth range was set from  $[-8 + \text{rotation degree}]$  to  $+8^\circ$  when the  
702 rotation degree was negative (counterclockwise), and from  $-8^\circ$  to  $[+8 + \text{rotation}$   
703  $\text{degree}]$  when the rotation degree was positive (clockwise) (green zone in Fig. 1B). Only  
704 the correct trials were used in the subsequent analysis.

### 705 **Electrophysiology**

706 Extracellular single-unit recordings were performed described previously (Fang et al.,  
707 2019) from three hemispheres in three monkeys. Briefly, under strictly sterile  
708 conditions and general anesthesia with isoflurane, a cylindrical recording chamber  
709 (Crist Instrument Co., Inc., Maryland, USA) of 22 mm in diameter was implanted in

710 the premotor cortex and in the parietal area 5. The location of the recording chamber  
711 on each animal was determined by individual MRI atlas (3T, Center for Excellence in  
712 Brain Science and Intelligence Technology, Institute of Neuroscience, Chinese  
713 Academy of Sciences) (Graziano, 1999; Graziano, Cooke, & Taylor, 2000; Matelli &  
714 Luppino, 2001). During the recording session, glass-coated tungsten electrodes (1–2  
715 M $\Omega$ ; Alpha Omega, Israel) were inserted into the cortex via a guide tube using multi-  
716 electrode driver (NAN electrode system; Plexon Inc., USA). On-line raw neural signals  
717 were processed offline to obtain a single unit by Offline Sorter (Plexon Inc., Dallas,  
718 TX). The sorted files were then exported to NeuroExplorer software (Plexon Inc.,  
719 Dallas, TX) to generate a mat format for analysis in MATLAB (Mathworks, Natick,  
720 MA, USA) and Python (The Python Software Foundation).

721

## 722 **Quantification and statistical analysis**

723 All statistical analyses were implemented with scripts written in MATLAB or Python.  
724 In premotor cortex, 475 neurons were recorded from two monkeys (272 neurons from  
725 Monkey H and 203 neurons from Monkey N); in parietal area 5, 238 neurons were  
726 recorded from two monkeys (116 neurons from Monkey N and 122 neurons from  
727 Monkey S). As all monkeys' behavior and model fitting results were similar, for all  
728 analyses, data were combined across monkeys. All related statistics are reported in the  
729 Figure legends.

## 730 **Analysis of behavior data**

### 731 *Bayesian causal inference model*

732 To capture the uncertainty of causal structure, the core of causal inference, the Bayesian  
733 causal inference (BCI) model described in a previous visual-proprioceptive integration  
734 study (Fang et al., 2019) was adopted. In the present study, the BCI framework included  
735 three models: (i) the full-segregation model, which assumes that visual and  
736 proprioceptive estimates of the arm's locations are drawn independently from different  
737 sources ( $C=2$ ) and processed independently; (ii) the forced-fusion model, which  
738 assumes that visual and proprioceptive estimates of the arm's locations are drawn from  
739 a common source ( $C=1$ ) and integrated optimally, weighted by their reliabilities; and  
740 (iii) the BCI model, which computes the final proprioceptive estimate by averaging the  
741 spatial estimates under full-segregation and forced-fusion assumptions weighted by the  
742 posterior probabilities of common source. Here, the BCI model assumes that both visual  
743 and proprioceptive location information ( $S_V$  and  $S_P$ ) are represented as  $x_V$  and  $x_P$   
744 in the neural system, respectively, which are drawn from the normal distribution with  
745 sensory noise [ $N(S_V, \sigma_V)$ ,  $N(S_P, \sigma_P)$ ]. The causal inference structure is determined by  
746 the joint distribution of two sensory signals (sensory likelihood) and the prior  
747 probability of a common source ( $P_{prior}$ ). Thus, according to the Bayesian rule, the  
748 posterior probability of common source (one source probability [ $P_{com}$ ]) is calculated  
749 as follows:

750 
$$p(C = 1|x_V, x_P) = \frac{p(x_V, x_P|C = 1)P_{prior}}{p(x_V, x_P|C = 1)P_{prior} + p(x_V, x_P|C=2)(1-P_{prior})}$$

751 and the two sources of probability are  $p(C = 2|x_V, x_P) = 1 - p(C = 1|x_V, x_P)$ . If the  
752 system completely “believes” the two sensory signals are from different sources (full-  
753 segregation situation), the proprioceptive arm position is estimated independently from  
754 the visual information, as follows:

755 
$$\hat{S}_{P,C=2} = \frac{\frac{x_P + \mu_{Pr}}{\sigma_P^2} + \frac{\mu_{Pr}}{\sigma_{Pr}^2}}{\frac{1}{\sigma_P^2} + \frac{1}{\sigma_{Pr}^2}}$$

756 where  $N(\mu_{Pr}, \sigma_{Pr})$  represents a prior distribution of arm locations. In this experiment,  
757 the  $\mu_{Pr}$  was set to 0 and  $\sigma_{Pr}$  was set to 10,000 to approximate a uniform distribution.  
758 If the system completely “believes” there is only one common source for the two  
759 sensory signals (forced-fusion situation), then the estimate of arm position is  
760 determined by the optimal integration rule, as follows:

761 
$$\hat{S}_{VP,C=1} = \frac{\frac{x_V + x_P + \mu_{Pr}}{\sigma_V^2 + \sigma_P^2 + \sigma_{Pr}^2}}{\frac{1}{\sigma_V^2} + \frac{1}{\sigma_P^2} + \frac{1}{\sigma_{Pr}^2}}$$

762 In the model simulation, the proprioceptive arm position at the end of the trial was  
763 set to zero ( $S_P = 0$ ), so that the visual arm position is the visual-propriceptive ( $S_V =$   
764 disparity). In the task, monkeys were required to report their proprioceptive arm  
765 position, thus only the proprioceptive estimate was simulated.

### 766 **Model fitting**

767 To estimate the best-fitting model parameters in the BCI model, for each recording  
768 session, an optimization search was implemented that maximized the log likelihood of  
769 each model given the monkey’s data under the VPC condition. The prior probability of  
770 common source ( $P_{prior}$ ) and visual and proprioceptive standard deviations,  $\sigma_V$  and  $\sigma_P$ ,  
771 respectively, were set as free parameters to be optimized. For each optimization step,  
772 5,000 trials per disparity were simulated to form the distribution, and the sum log  
773 likelihood of the observations given the model was calculated for each disparity. Then,  
774 the parameters were optimized by minimizing the sum log likelihood using a genetic  
775 algorithm (ga function in MATLAB). The procedure was the same as for the optimal  
776 integration model, except that there were no causal structures and only two free  
777 parameters ( $\sigma_V$  and  $\sigma_P$ ) need to be optimized. All simulation and optimization processes  
778 were performed in MATLAB. Only correct trials were included.

### 779 **Model comparison**

780 To determine the model that best explained the data at the group level using Bayesian  
781 Information Criterion (BIC), a Bayesian random-effects model comparison was used  
782 (Rigoux, Stephan, Friston, & Daunizeau, 2014).  $BIC = -2LL + k \times \ln(n)$ , where  $LL$   
783 denotes the log likelihood,  $k$  is the number of free parameters,  $n$  is the total number of  
784 data points, and  $\ln$  is the natural logarithm. Finally, the better model was identified at  
785 the group level by the exceedance the probability based on all sessions of monkeys’



786 BICs (Wozny, Beierholm, & Shams, 2010).

787 The models' goodness-of-fit was reported using the coefficient of determination  
788 ( $R^2$ )(Fang et al., 2019),

789 
$$R^2 = 1 - \exp \left[ -\frac{2}{n} \{LL(\hat{\beta}) - LL(0)\} \right],$$

790 Where  $LL(\hat{\beta})$  and  $LL(0)$  denote the log-likelihoods of the fitted and the null model,  
791 respectively, and  $n$  is the number of observations. The null model assumes that monkeys  
792 report the perceived arm position randomly over the disparity range from the leftmost  
793 to the rightmost. Thus, a uniform distribution over this span was predicted.

#### 794 ***P<sub>prior</sub> updating in causal inference***

795 To evaluate how the historical posterior probability of common source ( $P_{com}$ )  
796 influences the prior probability of common source ( $P_{prior}$ ), a Markov process was  
797 adopted to model the updating of ( $P_{prior}$ ). That is,

798 
$$p_{(C=1)}^n = p_{(C=1|C=1)} * p_{(C=1|Data)}^{n-1} + p_{(C=1|C=2)} * (1 - p_{(C=1|Data)}^{n-1}),$$

799 where  $p_{(C=1)}$  and  $p_{(C=1|Data)}$  denoted  $P_{prior}$  and  $P_{com}$  respectively, and  $n$  denotes the  
800  $n^{\text{th}}$  trial under the VPC condition. Two prior states were included: C=1 (one common  
801 source) and C=2 (two different sources) at each trial.  $p_{(C=1|C=1)}$  denotes the transition  
802 probability from one common source (C=1) to one common source (C=1), and  
803  $p_{(C=1|C=2)}$  denotes the transition probability from different sources (C=2) to one  
804 common source (C=1). For statistical significance analysis between  $p_{(C=1|C=1)}$  and  
805  $p_{(C=1|C=2)}$ , the Wilcoxon signed-rank test was used for paired data.

806 Note both  $P_{prior}$  and  $P_{com}$  are latent variables. During model fitting process, we first  
807 used the Bayesian causal inference model (as mentioned before) to find the overall  $P_{prior}$ ,  
808  $\sigma_P$ , and  $\sigma_V$  of the subjects in the day/session as the starting parameter of the  
809 subsequent Markov model. For all subsequent trials (except the first trial), both  $P_{prior}$   
810 and  $P_{com}$  are unknown. As time goes on, starting from the first trial, the  $P_{com}$  of the  
811 current trial is obtained through the Bayesian causal inference model, and the  $P_{prior}$  of  
812 the next trial is obtained through the integration probability ( $P_{com}$ ) or separation  
813 probability ( $1 - P_{com}$ ) which are multiplied and added by the corresponding transition  
814 probability. Here, we fitted the observed data--drift to get the two free parameters  
815 transition probability. Through the transition probability, we define the influence of the  
816  $P_{com}$  of the previous trial on the  $P_{prior}$  of the next trial.

#### 817 ***Updating of proprioceptive representation***

818 To evaluate whether the primary sensory representation was modulated by the belief of  
819 causal structure, the proprioceptive variance within and after VPC tasks was compared  
820 to the baseline condition. For the within effect, the proprioceptive drift was calculated  
821 using the trials with  $0^\circ$  disparity in the VPC task and trials in VP task (baseline  
822 condition). Here, the standard deviation (SD) of proprioceptive drift was used as a  
823 measurement for the reliability of proprioceptive representation, in which higher SD

824 indicates lower reliability and *vice versa*. The mean of the proprioceptive drift for each  
825 target was normalized to zero. For the after effect, the SDs of proprioceptive drift under  
826 the P condition were compared between after the VP condition (baseline condition) and  
827 after the VPC condition. To characterize the temporal dynamic of the proprioceptive  
828 updating (after effect), trials in the first third and in the last third of the P task were  
829 compared. As control, similar analysis was conducted for the raw mean of  
830 proprioceptive drift (Fig S2). For statistical significance analysis, Wilcoxon signed-  
831 rank test was used for paired data.

### 832 **Preprocessing of single-unit data**

833 To estimate continuous time-dependent firing rates, timestamps of spiking events were  
834 resampled at 1 kHz and converted into binary spikes for single trials. Spike trains were  
835 then convolved with a symmetric Hann kernel (MATLAB, MathWorks),

$$836 \quad \text{convolved}w(n) = A \left( 1 - \cos \left( 2\pi \frac{n}{N} \right) \right), 0 \leq n \leq N (N = L - 1),$$

837 where  $A$  is a normalization factor ensuring the sum of the kernel values equals 1.  
838 Window width  $L$  was set to 300 ms. Single neurons were included in the analysis only  
839 if they had been recorded for a full set of conditions (VP, P, and VPC conditions with 9  
840 disparities:  $0^\circ$ ,  $\pm 10^\circ$ ,  $\pm 20^\circ$ ,  $\pm 35^\circ$ , and  $\pm 45^\circ$ ).

841 Peri-stimulus time histograms (PSTHs) were then calculated for four epochs of  
842 interest in a trial: (i) the baseline epoch (500 ms before the onset of visual arm rotation),  
843 (ii) the preparation epoch (500 ms after the onset of the visual arm rotation), (iii) the  
844 target onset epoch (1,000 ms after the onset of target onset), and (iv) the target-holding  
845 epoch (500 ms after the onset of target holding). To smooth the firing rate at each time  
846 point, the neural firing rate was calculated by averaging in sliding windows (window  
847 size, 400 ms; step size, 100 ms) in a single trial, resulting in 22 time bins of mean firing  
848 rate for every single trial for subsequent dynamic analysis.

### 849 **Causal inference neuron**

850 To measure the representation of a single neuron for causal inference on a single trial,  
851 the probability that a single neuron would integrate or segregate the sensory information  
852 on a single trial was calculated (Fang et al., 2019). The basic assumption here is that in  
853 a single trial under the VPC condition, if the neuron is more inclined to represent  
854 integrated information, then its firing rate will be closer to its response under VP  
855 conditions and the farther away from the response under P conditions, and *vice versa*.  
856 The normalized weight of integration (VP weight) was calculated as follows:

- 857 (1) First, obtain the neuron response to the arm position under P and VP tasks and  
858 fit the von Mises distribution to get the tuning curve.
- 859 (2) Under VPC conditions, obtain the current visual arm and the real arm positions,  
860 and at the same time, obtain the neuron's firing rate when the arm is in the  
861 corresponding position under VP and P conditions,  $\lambda_{VP}$  and  $\lambda_P$ , respectively.
- 862 (3) The VP and P templates can be generated through the Poisson distribution:

$$863 \quad Pr_{VP}(X = k) = \frac{\lambda_{VP}^k e^{-\lambda_{VP}}}{k!},$$



864 
$$Pr_P(X = k) = \frac{\lambda_P^k e^{-\lambda_P}}{k!}.$$

865 (4) According to the corresponding probabilities,  $Pr_{VP}$  and  $Pr_P$  in the two  
866 templates are obtained, and the integration weights for this neuron in the VPC  
867 task can be obtained through standardization:

868 
$$VP \text{ weight} = \frac{Pr_{VP}}{(Pr_{VP} + Pr_P)}.$$

869 To quantitatively describe whether a single neuron is encoding causal inference, the  
870 correlation between  $P_{com}$  and VP weight is calculated. The logic is as follows: the  
871  $P_{com}$  can be used to measure the degree of integration of sensory information and  
872 separation of sensory information at the behavioral level, whereas VP weight can  
873 measure this characteristic at the electrophysiological level. Therefore, if a neuron is  
874 performing causal inference, there should be a significant positive correlation between  
875 the  $P_{com}$  and VP weight for the corresponding behavior. Neurons that (i) respond to  
876 VP/P conditions and (ii) for which  $P_{com}$  and VP weight are significantly positively  
877 correlated in the final holding stage are called causal inference neurons. The specific  
878 algorithm was as follows:

- 879 (1) First, obtain neurons with significant selectivity under VP and P conditions  
880 (ANOVA, main effect,  $p < 0.05$ ).
- 881 (2) According proprioception drift, all trials were divided into 29 classes.  
882 Continuous drift values were grouped into nine clusters:  $< -35^\circ$ ,  $[-35^\circ -25^\circ]$ ,  $[-$   
883  $25^\circ -15^\circ]$ ,  $[-15^\circ -6^\circ]$ ,  $[-6^\circ +6^\circ]$ ,  $[+6^\circ +15^\circ]$ ,  $[+15^\circ +25^\circ]$ ,  $[+25^\circ +35^\circ]$ ,  $> +35^\circ$ .  
884 To be noticed,  $\pm 6^\circ$  covers approximately 99% of drift distribution under the VP  
885 and P condition. Thus, for the disparity  $0^\circ$ , there was only one cluster  $[-6^\circ +6^\circ]$ .  
886 Since the distribution of drift becomes wider (higher variance) along with the  
887 larger the disparity, the more clusters would be assigned for big disparity. For  
888 example, for the disparity  $\pm 45^\circ$ , there were five clusters of drifts.  $P_{com}$  and VP  
889 weight were assigned for each class by averaging all trials within it. the Pearson  
890 correlation coefficient was then calculated between  $P_{com}$  and VP weight. If the  
891  $P_{com}$  and VP weight were correlated significantly and positively ( $p < 0.05$  and  
892  $r > 0$ ), the neuron was called as a causal inference neuron.

893 To evaluate whether the fraction of causal inference neurons was significant highly  
894 than chance level (5%), one sample Z-tests (one-sided) were conducted for each brain  
895 region, respectively.

## 896 Population pattern of causal inference

897 To visualize the VP weight pattern at the brain region level, the VP weight of each trial  
898 of a single neuron under VPC conditions was calculated and then divided into 29  
899 clusters as described above. Then, the bootstrap method was used to randomly select  
900 50 trials from each cluster for averaging. This was repeated 50 times to obtain the VP  
901 weight ( $50 \times 29$ ) of a neuron for visualization. This results in a  $50 \times 29 \times N$  matrix,  
902 where  $N$  indicates the number of neurons in each brain region. The trial corresponding  
903 to each neuron was averaged to obtain a  $50 \times 29$  matrix. The VP weights of a brain

904 region were visualized in a heatmap.

### 905 **High/low $P_{com}$ groups**

906 To characterize the dynamic representation of the  $P_{com}$  in the entire session, all trials  
907 in a recording session were divided into high  $P_{com}$  trials and low  $P_{com}$  trials on the  
908 basis of the relative proprioception drift (RD). The relative proprioception drift (RD =  
909 drift/disparity) of each trial was calculated. The basic idea was that the larger the  $P_{com}$ ,  
910 the more likely the monkey was to integrate the visual and proprioceptive information,  
911 and the corresponding RD is closer to 1. The top third and bottom third of the trials  
912 were designated the high  $P_{com}$  class and the low  $P_{com}$  class, respectively. These  
913 grouping methods were verified by the demixed principal component analysis (dPCA).

### 914 **dPCA**

915 The method for dPCA was adopted from that published in a previous study (Kobak et  
916 al., 2016). Time, target position/arm location ( $-30^\circ$ ,  $-20^\circ$ ,  $0^\circ$ ,  $20^\circ$ , and  $30^\circ$ ), and  $P_{com}$   
917 (VP, P, high  $P_{com}$  and low  $P_{com}$ ) were combined to obtain the marginalized  
918 covariance matrix of the three. The neurons whose trial number was not less than 5  
919 under a single condition were selected for dPCA. Population activity was then projected  
920 on the decoding axes and ordered by their explained total variance for each  
921 marginalization.

### 922 **Information encoded by individual neurons**

923 The percentage of explained variance (PEV) (Buschman, Siegel, Roy, & Miller, 2011)  
924 was used to measure the basic task components encoded by a single neuron, in which  
925 PEV reflected the degree to which the variance of a single neuron can be explained for  
926 a specific task component. Generally, PEV can be expressed as a statistical value of  $\eta^2$ ,  
927 that is, the ratio of the variance between groups to the total variance. As the statistical  
928 value of  $\eta^2$  has a strong positive bias for a small sample, the unbiased  $\omega^2$  statistical  
929 value ( $\omega$ PEV) (Olejnik & Algina, 2003) was used.

930 To evaluate the information about the locations of the veridical arm, visual arm,  
931 and estimated arm encoded by a single neuron in the VPC task, an analysis of  
932 covariance was used to decompose the variance, and the  $\omega$ PEV was calculated. In detail,  
933 for a single neuron,  $\omega$ PEV was calculated for each type of arm when setting other two  
934 types of arm locations as covariates. the whole reaching space was divided into 11 parts  
935 from,  $-45^\circ$  to  $45^\circ$ , to transform it from a continuous variable to a discrete variable. For  
936 statistical significance analysis comparing two brain regions, a nonparametric  
937 Wilcoxon rank-sum test was used for unpaired data.

938 The  $\omega$ PEV was calculated in each time bin to characterize the temporal dynamics  
939 of  $\omega$ PEV under VP and VPC ( $0^\circ$ ) conditions. The baseline was defined as the period  
940 500 ms before the onset of visual arm rotation, and the time bins significantly different  
941 from the baseline were determined by a one-sided, paired Wilcoxon signed-rank with  
942 false-discovery rate (FDR) correction. The time bins showing significant differences  
943 between VP and VPC ( $0^\circ$ ) conditions were determined by a cluster-based permutation  
944 test(Gramfort et al., 2013).

## 945 **Population decoding analysis**

### 946 ***Decoding of $P_{com}$***

947 The population decoding analysis of  $P_{com}$  was performed by the linear support vector  
948 machine (SVM) classifiers with the scikit-learn toolbox (Pedregosa et al., 2011). All  
949 neurons were included in this analysis without considering their  $P_{com}$  selectivity. The  
950 classifier was trained to classify the  $P_{com}$  (high/low  $P_{com}$ ) with neural activity (peri-  
951 stimulus time histograms) from each brain region. All recording sessions were pooled  
952 to form a pseudo-population. Neurons with more than 50 trials in each  $P_{com}$  group  
953 were included in this analysis. Tenfold cross-validation was then implemented by  
954 splitting the neural data into 10 subsamples, each randomly drawn from the entire  
955 dataset. Decoders were then trained on 9 of the subsamples and tested on the remaining  
956 one. This process was repeated 10 times to obtain the decoding accuracy by averaging  
957 across all 10 decoders. This cross-validation process was repeated 1,000 times, and the  
958 overall decoding accuracy was taken as the mean across the 1,000 repetitions. The  
959 decoding analysis was conducted for all time points. The significance for decoding  
960 accuracy was determined by comparing the mean decoding accuracy to the null  
961 distribution from the shuffled data. The significant time duration was determined using  
962 a cluster-based permutation test for multiple comparisons across time  
963 intervals (Gramfort et al., 2013).

964 To test whether premotor cortex neurons encode  $P_{com}$  earlier than area 5, a  
965 randomization test was performed between them. The corresponding numbers (here, 50  
966 neurons per region) of neurons were randomly exchanged between the paired regions  
967 1,000 times to generate a null distribution (chance level) of time lags, and the  
968 significance was determined by a permutation test of the true time lag from the original  
969 data and the null distribution.

### 970 ***Decoding of $P_{prior}$***

971 Neurons with more than 50 trials in each  $P_{com}$  group (high and low  $P_{com}$  groups,  
972 same as for the  $P_{com}$  decoding analysis described above) were selected for the  $P_{prior}$   
973 updating decoding. The decoding procedure was the same as described for “*Decoding*  
974 *of  $P_{com}$* ” unless the trials were sorted and labeled by the previous trial’s  $P_{com}$  ( $n^{\text{th}}$  trial  
975  $- 1$  to  $n^{\text{th}}$  trial  $- 4$ ) under the VPC condition. The statistical significance was determined  
976 by a cluster-based permutation test (Gramfort et al., 2013).

### 977 ***Subspace overlap analysis***

978 PCA was performed on neural activities during the baseline period and during the  
979 target-holding period. The first ten PCs during each period were used to obtain the  
980  $P_{prior}$  and  $P_{com}$  subspaces. To test the overlap of these subspaces, the baseline-period  
981 activity was projected onto the  $P_{prior}$  subspace, and the percent variance explained  
982 relative to the total variance of the baseline period data was quantified; similarly, the  
983 target-holding period activity was projected onto the  $P_{com}$  subspace, and the percent  
984 variance explained relative to the total variance of the target-holding period data was

985 quantified(Elsayed et al., 2016).

### 986 ***Decoding of arm locations***

987 All arm locations were separated into 5 spatial bins:  $-30^\circ$ ,  $-20^\circ$ ,  $0^\circ$ ,  $20^\circ$ , and  $30^\circ$ . The  
988 basic decoding procedure was the same as described above for “*Decoding of  $P_{com}$* .”  
989 Neurons with more than 6 trials in each arm location bin were selected. Leave-one-out  
990 cross-validation was then implemented, and this process was repeated 1,000 times to  
991 obtain the averaged decoding accuracy. The decoding analysis was conducted for all  
992 time points. Statistical significance for decoding accuracy was determined by  
993 comparing the mean decoding accuracy to the null distribution from shuffled data. The  
994 time bins with significant difference between conditions (VP and VPC [ $0^\circ$ ]) were  
995 determined by the cluster-based permutation test for multiple comparisons across time  
996 intervals(Gramfort et al., 2013).

### 997 **Joint peri-event canonical correlation (jPECC) analysis**

998 To test the relationship between population activities in the two brain regions, the  
999 jPECC method described in a previous study (Steinmetz et al., 2019) was utilized. First,  
1000 the neuronal responses in two brain regions under the same behavior conditions, namely,  
1001 high  $P_{com}$  and low  $P_{com}$ , were aligned. Then, a PCA was conducted across time and  
1002 trials to reduce the dimensionality to obtain the first 10 principal components (PCs) for  
1003 each brain region. The trials were then divided into ten equal parts (training set and  
1004 testing set) for cross-validation (10-fold cross-validation). The PCs of the training set  
1005 of each brain region were used to perform a canonical correlation analysis to obtain the  
1006 first pair of canonical correlation components (L2 regularization,  $\lambda = 0.5$ ). Then, the  
1007 PCs of the testing set from each brain region were projected onto the first pair of  
1008 canonical correlation components, and the correlation was determined by the Pearson  
1009 correlation coefficient between these projections from each region. This analysis was  
1010 performed for each pair of time bins to construct a cross-validated correlation  
1011 coefficient matrix. Fifty trials for each group (high  $P_{com}$  and low  $P_{com}$ ) from each  
1012 brain region were randomly selected by bootstrapping in this analysis. Finally, a  
1013 heatmap was obtained by averaging the correlation coefficient matrix repeated 1,000  
1014 times.

1015 To quantify the lead–lag relationship of information exchange between brain  
1016 regions, an asymmetric index was calculated by diagonally slicing the jPECC matrix  
1017 from  $+300$  ms to  $+300$  ms relative to each time point (Steinmetz et al., 2019). For time  
1018 point  $t$ , the average correlation coefficient across the left half of this slice (that is, the  
1019 average along a vector from  $[t - 300, t + 300]$  to  $[t, t]$ ) was subtracted from the right  
1020 half of this slice (from  $[t, t]$  to  $[t + 300, t - 300]$ ) to yield the asymmetry index. To test  
1021 the leading significant time point across brain regions, the data from neurons in these  
1022 brain regions were exchanged, and the above-described analysis was repeated 1,000  
1023 times to obtain the null distribution of the asymmetric index. Then, a cluster-based  
1024 permutation test was performed to test whether the symmetric index was significantly  
1025 greater than the chance level(Gramfort et al., 2013).

1026 To further exclude the possibility that the observed lead–lag relationship resulted  
1027 from the intrinsic properties of neuronal activities rather than the encoded information  
1028 in these regions, all trials in each brain region were shuffled to ensure that the inter-  
1029 region trials were not aligned. Then, the analysis was repeated as described above to  
1030 obtain the asymmetric index.

1031

## 1032 DATA AND CODE AVAILABILITY

1033 Raw electrophysiology recording files, due to their size (multiple terabytes), are  
1034 available upon reasonable request.

1035

## 1036 REFERENCE

1037 Acerbi, L., Dokka, K., Angelaki, D. E., & Ma, W. J. (2018). Bayesian comparison of  
1038 explicit and implicit causal inference strategies in multisensory heading  
1039 perception. *PLoS Comput Biol*, *14*(7), e1006110.  
1040 doi:10.1371/journal.pcbi.1006110

1041 Akrami, A., Kopec, C. D., Diamond, M. E., & Brody, C. D. (2018). Posterior parietal  
1042 cortex represents sensory history and mediates its effects on behaviour. *Nature*,  
1043 *554*(7692), 368-372. doi:10.1038/nature25510

1044 Aller, M., & Noppeney, U. (2019). To integrate or not to integrate: Temporal dynamics  
1045 of hierarchical Bayesian causal inference. *PLoS Biol*, *17*(4), e3000210.  
1046 doi:10.1371/journal.pbio.3000210

1047 Blanke, O., Slater, M., & Serino, A. (2015). Behavioral, Neural, and Computational  
1048 Principles of Bodily Self-Consciousness. *Neuron*, *88*(1), 145-166.  
1049 doi:10.1016/j.neuron.2015.09.029

1050 Botvinick, M., & Cohen, J. (1998). Rubber hands 'feel' touch that eyes see. *Nature*,  
1051 *391*(6669), 756. doi:10.1038/35784

1052 Buschman, T. J., Siegel, M., Roy, J. E., & Miller, E. K. (2011). Neural substrates of  
1053 cognitive capacity limitations. *Proc Natl Acad Sci U S A*, *108*(27), 11252-11255.  
1054 doi:10.1073/pnas.1104666108

1055 Cao, Y., Summerfield, C., Park, H., Giordano, B. L., & Kayser, C. (2019). Causal  
1056 Inference in the Multisensory Brain. *Neuron*, *102*(5), 1076-1087 e1078.  
1057 doi:10.1016/j.neuron.2019.03.043

1058 Darlington, T. R., Beck, J. M., & Lisberger, S. G. (2018). Neural implementation of  
1059 Bayesian inference in a sensorimotor behavior. *Nat Neurosci*, *21*(10), 1442-  
1060 1451. doi:10.1038/s41593-018-0233-y

1061 Deroy, O., Spence, C., & Noppeney, U. (2016). Metacognition in Multisensory  
1062 Perception. *Trends Cogn Sci*, *20*(10), 736-747. doi:10.1016/j.tics.2016.08.006

1063 Dokka, K., Park, H., Jansen, M., DeAngelis, G. C., & Angelaki, D. E. (2019). Causal  
1064 inference accounts for heading perception in the presence of object motion. *Proc  
1065 Natl Acad Sci U S A*, *116*(18), 9060-9065. doi:10.1073/pnas.1820373116

1066 Ehrsson, H. H., & Chancel, M. (2019). Premotor cortex implements causal inference in



- 1067 multisensory own-body perception. *Proc Natl Acad Sci U S A*, 116(40), 19771-  
1068 19773. doi:10.1073/pnas.1914000116
- 1069 Ehrsson, H. H., Spence, C., & Passingham, R. E. (2004). That's my hand! Activity in  
1070 premotor cortex reflects feeling of ownership of a limb. *Science*, 305(5685),  
1071 875-877. doi:10.1126/science.1097011
- 1072 Elsayed, G. F., Lara, A. H., Kaufman, M. T., Churchland, M. M., & Cunningham, J. P.  
1073 (2016). Reorganization between preparatory and movement population  
1074 responses in motor cortex. *Nat Commun*, 7, 13239. doi:10.1038/ncomms13239
- 1075 Ernst, M. O., & Banks, M. S. (2002). Humans integrate visual and haptic information  
1076 in a statistically optimal fashion. *Nature*, 415(6870), 429-433.  
1077 doi:10.1038/415429a
- 1078 Fang, W., Li, J., Qi, G., Li, S., Sigman, M., & Wang, L. (2019). Statistical inference of  
1079 body representation in the macaque brain. *Proc Natl Acad Sci U S A*, 116(40),  
1080 20151-20157. doi:10.1073/pnas.1902334116
- 1081 Fetsch, C. R., DeAngelis, G. C., & Angelaki, D. E. (2013). Bridging the gap between  
1082 theories of sensory cue integration and the physiology of multisensory neurons.  
1083 *Nat Rev Neurosci*, 14(6), 429-442. doi:10.1038/nrn3503
- 1084 French, R. L., & DeAngelis, G. C. (2020). Multisensory neural processing: from cue  
1085 integration to causal inference. *Curr Opin Physiol*, 16, 8-13.  
1086 doi:10.1016/j.cophys.2020.04.004
- 1087 Gramfort, A., Luessi, M., Larson, E., Engemann, D. A., Strohmeier, D., Brodbeck,  
1088 C., . . . Hamalainen, M. (2013). MEG and EEG data analysis with MNE-Python.  
1089 *Front Neurosci*, 7, 267. doi:10.3389/fnins.2013.00267
- 1090 Graziano, M. S. (1999). Where is my arm? The relative role of vision and  
1091 proprioception in the neuronal representation of limb position. *Proc Natl Acad  
1092 Sci U S A*, 96(18), 10418-10421. doi:10.1073/pnas.96.18.10418
- 1093 Graziano, M. S., Cooke, D. F., & Taylor, C. S. (2000). Coding the location of the arm  
1094 by sight. *Science*, 290(5497), 1782-1786. doi:10.1126/science.290.5497.1782
- 1095 Haggard, P. (2017). Sense of agency in the human brain. *Nat Rev Neurosci*, 18(4), 196-  
1096 207. doi:10.1038/nrn.2017.14
- 1097 Kayser, C., & Shams, L. (2015). Multisensory causal inference in the brain. *PLoS Biol*,  
1098 13(2), e1002075. doi:10.1371/journal.pbio.1002075
- 1099 Keromnes, G., Chokron, S., Celume, M. P., Berthoz, A., Botbol, M., Canitano, R., . . .  
1100 Tordjman, S. (2019). Exploring Self-Consciousness From Self- and Other-  
1101 Image Recognition in the Mirror: Concepts and Evaluation. *Front Psychol*, 10,  
1102 719. doi:10.3389/fpsyg.2019.00719
- 1103 Kilteni, K., Maselli, A., Kording, K. P., & Slater, M. (2015). Over my fake body: body  
1104 ownership illusions for studying the multisensory basis of own-body perception.  
1105 *Front Hum Neurosci*, 9, 141. doi:10.3389/fnhum.2015.00141
- 1106 Kobak, D., Brendel, W., Constantinidis, C., Feierstein, C. E., Kepecs, A., Mainen, Z.  
1107 F., . . . Machens, C. K. (2016). Demixed principal component analysis of neural  
1108 population data. *Elife*, 5. doi:10.7554/eLife.10989

- 1109 Kording, K. P., Beierholm, U., Ma, W. J., Quartz, S., Tenenbaum, J. B., & Shams, L.  
1110 (2007). Causal inference in multisensory perception. *PLoS One*, *2*(9), e943.  
1111 doi:10.1371/journal.pone.0000943
- 1112 Kording, K. P., & Wolpert, D. M. (2004). Bayesian integration in sensorimotor learning.  
1113 *Nature*, *427*(6971), 244-247. doi:10.1038/nature02169
- 1114 Legaspi, R., & Toyozumi, T. (2019). A Bayesian psychophysics model of sense of  
1115 agency. *Nat Commun*, *10*(1), 4250. doi:10.1038/s41467-019-12170-0
- 1116 Lochmann, T., & Deneve, S. (2011). Neural processing as causal inference. *Curr Opin*  
1117 *Neurobiol*, *21*(5), 774-781. doi:10.1016/j.conb.2011.05.018
- 1118 Matelli, M., & Luppino, G. (2001). Parietofrontal circuits for action and space  
1119 perception in the macaque monkey. *Neuroimage*, *14*(1 Pt 2), S27-32.  
1120 doi:10.1006/nimg.2001.0835
- 1121 Mohl, J. T., Pearson, J. M., & Groh, J. M. (2020). Monkeys and humans implement  
1122 causal inference to simultaneously localize auditory and visual stimuli. *J*  
1123 *Neurophysiol*, *124*(3), 715-727. doi:10.1152/jn.00046.2020
- 1124 Morgan, M. L., Deangelis, G. C., & Angelaki, D. E. (2008). Multisensory integration  
1125 in macaque visual cortex depends on cue reliability. *Neuron*, *59*(4), 662-673.  
1126 doi:10.1016/j.neuron.2008.06.024
- 1127 Olejnik, S., & Algina, J. (2003). Generalized eta and omega squared statistics: measures  
1128 of effect size for some common research designs. *Psychol Methods*, *8*(4), 434-  
1129 447. doi:10.1037/1082-989X.8.4.434
- 1130 Pedregosa, F., Varoquaux, G., Gramfort, A., Michel, V., Thirion, B., Grisel, O., . . .  
1131 Duchesnay, E. (2011). Scikit-learn: Machine Learning in Python. *Journal of*  
1132 *Machine Learning Research*, *12*, 2825-2830. Retrieved from <Go to  
1133 ISI>://WOS:000298103200003
- 1134 Porter, K. K., Metzger, R. R., & Groh, J. M. (2007). Visual- and saccade-related signals  
1135 in the primate inferior colliculus. *Proc Natl Acad Sci U S A*, *104*(45), 17855-  
1136 17860. doi:10.1073/pnas.0706249104
- 1137 Rao, V., DeAngelis, G. C., & Snyder, L. H. (2012). Neural correlates of prior  
1138 expectations of motion in the lateral intraparietal and middle temporal areas. *J*  
1139 *Neurosci*, *32*(29), 10063-10074. doi:10.1523/JNEUROSCI.5948-11.2012
- 1140 Rigoux, L., Stephan, K. E., Friston, K. J., & Daunizeau, J. (2014). Bayesian model  
1141 selection for group studies - revisited. *Neuroimage*, *84*, 971-985.  
1142 doi:10.1016/j.neuroimage.2013.08.065
- 1143 Rohe, T., Ehrlis, A. C., & Noppeney, U. (2019). The neural dynamics of hierarchical  
1144 Bayesian causal inference in multisensory perception. *Nat Commun*, *10*(1),  
1145 1907. doi:10.1038/s41467-019-09664-2
- 1146 Rohe, T., & Noppeney, U. (2015). Cortical hierarchies perform Bayesian causal  
1147 inference in multisensory perception. *PLoS Biol*, *13*(2), e1002073.  
1148 doi:10.1371/journal.pbio.1002073
- 1149 Rohe, T., & Noppeney, U. (2016). Distinct Computational Principles Govern  
1150 Multisensory Integration in Primary Sensory and Association Cortices. *Curr*

- 1151 *Biol*, 26(4), 509-514. doi:10.1016/j.cub.2015.12.056
- 1152 Sato, Y., Toyoizumi, T., & Aihara, K. (2007). Bayesian inference explains perception  
1153 of unity and ventriloquism aftereffect: identification of common sources of  
1154 audiovisual stimuli. *Neural Computation*, 19(12), 3335-3355.
- 1155 Shams, L., & Beierholm, U. R. (2010). Causal inference in perception. *Trends Cogn  
1156 Sci*, 14(9), 425-432. doi:10.1016/j.tics.2010.07.001
- 1157 Stein, B. E., & Stanford, T. R. (2008). Multisensory integration: current issues from the  
1158 perspective of the single neuron. *Nat Rev Neurosci*, 9(4), 255-266.  
1159 doi:10.1038/nrn2331
- 1160 Steinmetz, N. A., Zatzka-Haas, P., Carandini, M., & Harris, K. D. (2019). Distributed  
1161 coding of choice, action and engagement across the mouse brain. *Nature*,  
1162 576(7786), 266-273. doi:10.1038/s41586-019-1787-x
- 1163 Wozny, D. R., Beierholm, U. R., & Shams, L. (2010). Probability matching as a  
1164 computational strategy used in perception. *PLoS Comput Biol*, 6(8).  
1165 doi:10.1371/journal.pcbi.1000871  
1166



1167 **SUPPLEMENTARY INFORMATION**

1168 **Table S1. Model parameters and fitting evaluations of two models for monkeys.**

| Subject  | Causal inference (model averaging) |        |                |            |            |              | Forced fusion           |          |                |            |            |
|----------|------------------------------------|--------|----------------|------------|------------|--------------|-------------------------|----------|----------------|------------|------------|
|          | relBIC <sub>Group</sub>            | EP     | R <sup>2</sup> | $\sigma_P$ | $\sigma_V$ | $P_{prior}$  | relBIC <sub>Group</sub> | EP       | R <sup>2</sup> | $\sigma_P$ | $\sigma_V$ |
| Monkey H | 0                                  | >0.999 | 0.96±0.0017    | 7.72±0.14  | 5.83±0.090 | 0.999±0.0004 | 329.52                  | 2.31E-14 | 0.93±0.0039    | 9.87±0.24  | 9.02±0.23  |
| Monkey N | 0                                  | >0.999 | 0.93±0.0080    | 9.56±0.16  | 4.93±0.15  | 0.86±0.026   | 812.34                  | 4.04E-28 | 0.37±0.36      | 11.34±0.10 | 10.46±0.13 |
| Monkey S | 0                                  | >0.999 | 0.96±0.0022    | 8.98±0.14  | 5.72±0.22  | 0.98±0.012   | 290.04                  | 7.57E-23 | 0.94±0.0027    | 10.10±0.14 | 8.34±0.17  |

1169 The model parameters and  $R^2$  were averaged across days for monkeys; data are presented as the means  $\pm$  the standard errors of the means. The  
 1170 relBIC<sub>group</sub> was the summation of all days' BIC for monkeys.

1171 Abbreviations:  $\sigma_P$ , standard deviation of the proprioception likelihood;  $\sigma_V$ , standard deviation of the vision likelihood;  $P_{prior}$ , prior probability of  
 1172 common source; relBIC<sub>group</sub>, Bayesian information criterion at the group level; EP, exceedance probability;  $R^2$ , coefficient of determination.

1173

1174

1175

1176

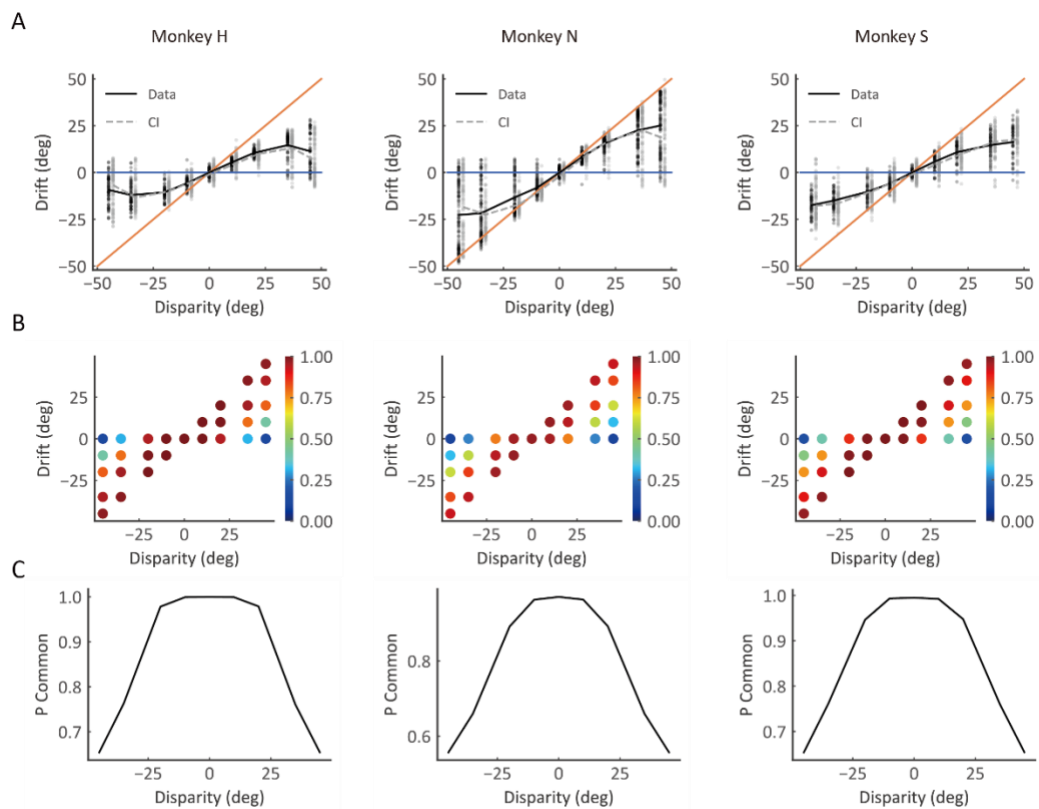

1177

1178 **Figure S1. Behavior performance and causal inference model predict results in individual**  
1179 **monkeys. (A)** The pattern of drift is consistent across all three monkeys (black lines and dots), and the  
1180 predictions of the causal inference model (gray lines and dots) characterized monkeys' behavior data.  
1181 Each dot represents a single trial, and lines represent the average result. The blue and orange solid lines  
1182 represent the visual and proprioceptive bias, respectively. **(B)** Model prediction of the posterior  
1183 probability of common source ( $P_{com}$ ). Each dot represents the averaged  $P_{com}$  in a cluster grouped by the  
1184 disparity and drift based on the monkey's behavior. **(C)** Average  $P_{com}$  as the function of disparity. The  
1185 black lines represent the average  $P_{com}$  of each monkey.

1186

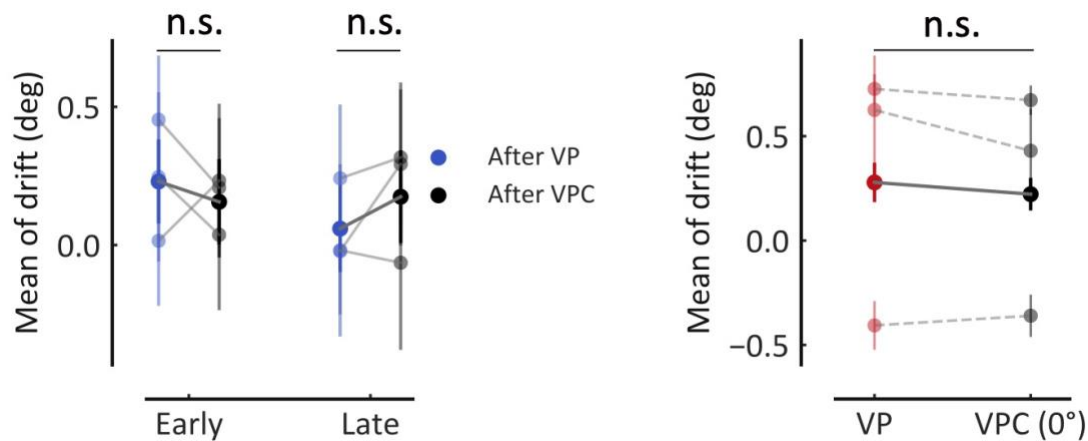

1187

1188 **Figure S2. Sensory updating is not reflected in the mean of drift.** Left: mean drift in P blocks after  
1189 VP and VPC tasks. The solid lines represent the means of drift in VP and VPC (0°) tasks across all  
1190 sessions of all monkeys in the early part of the sessions (Wilcoxon signed-rank test,  $W = 3,591.0$ ,  $p =$   
1191  $0.37$ , FDR) and the late part of the sessions (Wilcoxon signed-rank test,  $W = 3749.0$ ,  $p = 0.37$ , FDR).  
1192 Right: mean of drift in VPC (0°) trials was not significantly different from that in VP trials (Wilcoxon  
1193 signed-rank test,  $W = 13,668.0$ ,  $p = 0.29$ ). The dashed lines represent the means of the drift for VP and  
1194 VPC (0°) tasks in each monkey. Error bars indicate the SEMs. n.s., not significant.

1195

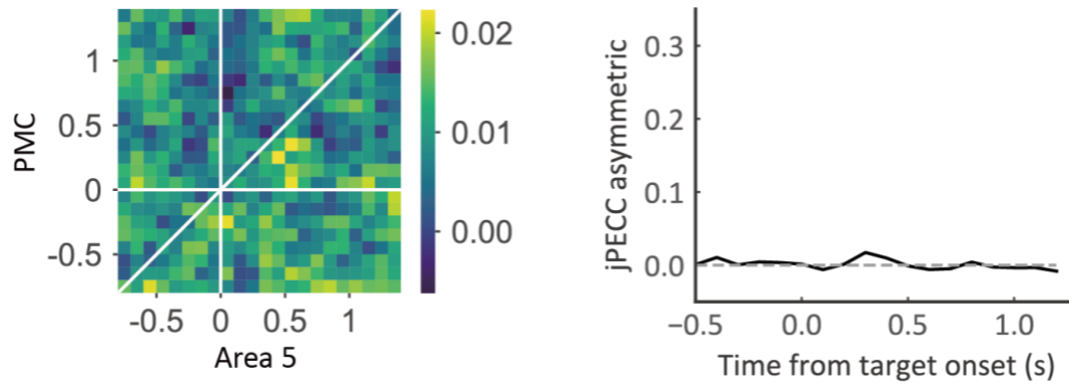

1196

1197 **Figure S3. jPECC analysis with shuffled temporal alignment trials.** For determining whether  
1198 correlations occur with a temporal offset between premotor and parietal cortices after shuffling the trials'  
1199 alignment. Left: cross-validated correlation coefficient between premotor and parietal cortices. The  
1200 trial's temporal alignment was shuffled to determine whether correlations occur with a temporal offset  
1201 between the paired brain regions. Right: the black line represents the lead-lag interactions as a function  
1202 of time relative to target onset, and the gray dashed line represents the chance level (chance level = 0).  
1203

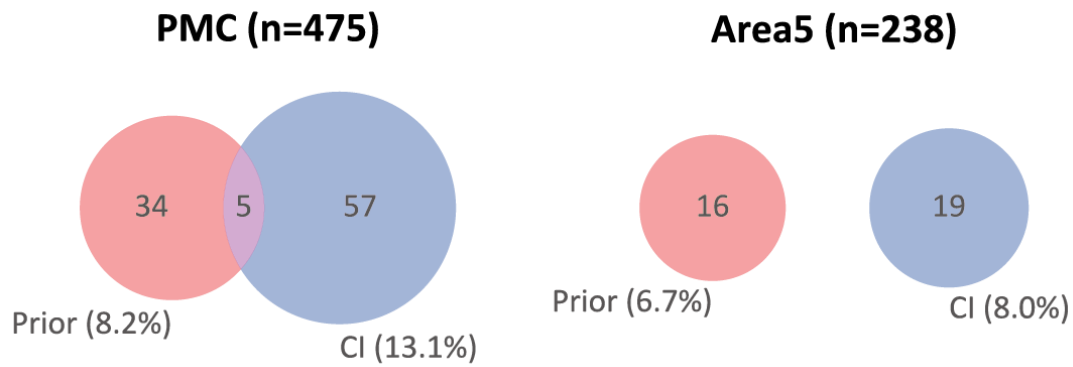

1204

1205 **Figure S4. Percentage of prior-selective neurons and causal inference (CI) neurons.** Red, the  
1206 number of pure prior-selective neurons; blue, the number of pure CI neurons; purple, the number of  
1207 dual-selective neurons.

1208
